# Supplementary material for: Tubulin-folding cofactor E deficiency promotes vascular dysfunction by increased endoplasmic reticulum stress
Source: PubMed Central journal article supplement — Eur Heart J. 2021 Jun 16;43(6):488–500. doi: 10.1093/eurheartj/ehab222 (PMC8830526; doi:10.1093/eurheartj/ehab222), 2021-06-16
Supplement: ehab222_supplementary_data.pdf [file ehab222_supplementary_data.pdf]

1 **Supplementary data**

2

3 **Tubulin-folding cofactor E deficiency promotes vascular dysfunction by increased**  
4 **endoplasmic reticulum stress.**

5 Panagiotis Efentakis<sup>1,2</sup>, Michael Molitor<sup>1,2,3</sup>, Sabine Kossmann<sup>1,2</sup>, Magdalena L. Bochenek<sup>1,2,3</sup>,  
6 Johannes Wild<sup>1,2</sup>, Jeremy Lagrange<sup>1,2</sup>, Stefanie Finger<sup>2</sup>, Rebecca Jung<sup>2</sup>, Susanne  
7 Karbach<sup>1,2,3</sup>, Katrin Schäfer<sup>1,3</sup>, Andreas Schulz<sup>4</sup>, Philipp Wild<sup>2,3,4</sup>, Thomas Münzel<sup>1,2,3</sup> #, Philip  
8 Wenzel<sup>1,2,3</sup> #\*

9

10 <sup>1</sup> Department of Cardiology, University Medical Center Mainz

11 <sup>2</sup> Center for Thrombosis and Hemostasis, University Medical Center Mainz

12 <sup>3</sup> German Center for Cardiovascular Research (DZHK) - Partner site Rhine-Main

13 <sup>4</sup> Department of Cardiology - Preventive Cardiology and Medical Prevention, University  
14 Medical Center Mainz

15 # equal contribution

16

17

18 **\*Address for correspondence:** Philip Wenzel, Department of Cardiology and Center for  
19 Thrombosis and Hemostasis, University Medical Center Mainz, Langenbeckstraße 1, 55131  
20 Mainz, Germany, Phone: +49 6131 17 7695, E-Mail: [wenzelp@uni-mainz.de](mailto:wenzelp@uni-mainz.de)

## 21 **Supplementary Methods**

### 22 **Genome-wide association study (GWAS)**

23 SNP information was gained from the genome data available from the Gutenberg Health Study  
24 (GHS) as previously described <sup>1</sup>. Genotyping was conducted on Affymetrix Genome-Wide  
25 Human SNP 6.0 arrays (Affymetrix, Santa Clara, CA) according to the manufacturer's  
26 recommendations for a population sample of 5,000 individuals. After a quality control review,  
27 genetic data were available for analysis in 4,175 individuals. Before genotype imputation,  
28 SNPs with a significant ( $P < 10^4$ ) deviation from the Hardy-Weinberg equilibrium with minor  
29 allele frequency  $< 1\%$  or having a genotyping call rate  $< 98\%$  were excluded. Correlation  
30 analysis by linear regression was performed in order to identify SNPs that were associated  
31 with flow mediated dilation (FMD).

32 The Genotype-Tissue Expression (GTEx) Project was supported by the Common Fund of the  
33 Office of the Director of the National Institutes of Health, and by NCI, NHGRI, NHLBI, NIDA,  
34 NIMH, and NINDS. The data used for the analyses described in this manuscript were obtained  
35 from the GTEx Portal and dbGaP accession number phs000424.vN.pN on June 2019.

### 36 **Animals**

37 Three different strains of cell-specific, conditional TBCE knockout mice were generated by  
38 serial crossings. TBCE<sup>tm1c</sup> mice were first generated according to EUCOMM® instructions <sup>2, 3</sup>  
39 in a "flippase-first" approach to generate TBCE<sup>tm2c</sup> and then crossed with Cre<sup>+/-</sup> mice to create  
40 the conditional knockout mice Cre<sup>+/-</sup>TBCE<sup>fl/fl</sup> (C57BL/6J background). The Cre transgene was  
41 kept only in the male breeders, while female breeders were Cre-negative (Cre<sup>-/-</sup>) in order to  
42 avoid germline deletion of the gene <sup>4</sup>. LysMCre<sup>+/-</sup>TBCE<sup>fl/fl</sup> mice were generated as myeloid cell  
43 specific deficiency of TBCE <sup>5</sup>, Tie2-ERT2Cre<sup>+/-</sup>TBCE<sup>fl/fl</sup> mice as a conditional knockdown  
44 model in endothelial cells <sup>6</sup>, and SMMHC-ERT2Cre<sup>+/-</sup>TBCE<sup>fl/fl</sup> as a conditional knockdown  
45 model in smooth muscle cells <sup>7</sup>. For all the above-mentioned strains, age-matched Cre<sup>+/-</sup>  
46 TBCE<sup>wt/wt</sup> littermates were used as controls in all experiments. Tie2-ERT2Cre<sup>+/-</sup>TBCE<sup>fl/fl</sup> mice  
47 and their respective control were fed tamoxifen diet (Envigo®, Horst, Netherlands) for the  
48 activation of the Cre gene for 8 weeks starting at the age of 3-4 weeks, while SMMHC-  
49 ERT2Cre<sup>+/-</sup>TBCE<sup>fl/fl</sup> mice were fed with tamoxifen-containing rodent chow (Envigo®, Horst,  
50 Netherlands) for 6 weeks starting at an age of 5-6 weeks. A total of 60 LysMCre<sup>+/-</sup>TBCE<sup>fl/fl</sup>, 80  
51 Tie2-ERT2Cre<sup>+/-</sup>TBCE<sup>fl/fl</sup> and 140 SMMHC-ERT2Cre<sup>+/-</sup>TBCE<sup>fl/fl</sup> mice were used in the  
52 experiments. Mice were housed under SPF conditions with a maximum of 5 animals per cage.  
53 All animals were inbred and received proper care in compliance with the Guide for the Care  
54 and Use of Laboratory Animals published by the US National Institutes of Health (NIH  
55 Publication No. 85-23, revised 1985) and were approved by the Ethical Committee of the  
56 Prefecture of Rheinland-Pfalz (G17-1-031). All animal experiments were performed in line with  
57 ARRIVE guidelines <sup>8</sup>.

58 All animals were 12-14 weeks of age at the time of experimentation. Before organ harvest,  
59 animals were euthanized by an overdose of isoflurane, followed by cervical dislocation. To  
60 minimize the effect of subjective bias, animals were randomly assigned to the groups in each  
61 experimental design. Researchers in the final experimentation (organ harvest) were blinded  
62 to the strains. The breeding strategy, genotyping and workflow are described in **Figure S2**.  
63 For the in vivo experiments sample size was calculated using G\*POWER 3.1.9.2 software  
64 (Power 0.8,  $\alpha$  error prob. 0.05, F-Test, ANOVA: Fixed effects, omnibus, one-way). Primary  
65 endpoints were preselected prior to the initiation of the in vivo experiments. Animals that did  
66 not meet the wellbeing criteria regarding the 3Rs were excluded from the experiments, while  
67 no outliers were removed from the experiments

68

69 **Genotyping:** For the generation of the *tm1c* mice, the genotype of the animals was identified  
70 by RCR analysis of genomic DNA gained from tail samples of the mice using Mouse Direct  
71 PCR Kit according to the manufacturer's instructions (B45012, Biomake.com). For *tbce* a band  
72 at 500bp corresponds to the "pseudo-wt" or floxed mice, a double band at 300-500 bp to the  
73 heterozygote mice, while a single band at 400 bp indicates a wild-type animal. For *tm1c*, the  
74 presence of a band at 300 bp indicate the presence of the construct which is prerequisite for the  
75 generation of the floxed mice. In the same mice an absence of a band at 300 bp for the 5FRT  
76 and FLP is necessary, indicating the removal of the 5FRT and FLP constructs from the  
77 genome (**Figure S2** upper panel).

78 For the *LysMCre<sup>+/-</sup>TBCE<sup>tm2c</sup>* mice, a band at 300-400 bps using the *LysM* wt PCR primers  
79 indicates the absence of Cre in at least one of the two strands, while a band at 700-900 bps  
80 using the *LysM* tg PCR primers indicate the presence of Cre in at least one of the two strands.  
81 The identification of *TBCE<sup>wt/wt</sup>* and *TBCE<sup>fl/fl</sup>* mice was conducted as previously described, while  
82 for the successful cleavage of the gene the *tm1d* PCR was conducted and confirmed with a  
83 PCR band between 100-200 bps (**Figure S2** second row panel).

84 For *Tie2-ERT2-Cre<sup>+/-</sup>TBCE<sup>tm2c</sup>* mice, the presence of Cre was confirmed with the respective  
85 *Tie2-ERT2-Cre* PCR primers, where the presence of the gene was confirmed with a band at  
86 400 bps. The heterozygote genotype of the *Tie2-ERT2-Cre<sup>+/-</sup>TBCE<sup>tm2c</sup>* mice was secured by  
87 heterozygote breeding of the mice concerning the Cre, while TBCE and *tm1c* PCRs were  
88 conducted as previously described (**Figure S2** third row panel).

89 For *SMMHC-ERT2-Cre<sup>+/-</sup>TBCE<sup>tm2c</sup>* mice the presence of Cre was confirmed with the  
90 respective *SMMHC-ERT2-Cre* PCR primers. A single band at 200 bps represented the *Cre<sup>-/-</sup>*  
91 mice, a double band at 300-200bps represented the heterozygote *Cre<sup>+/-</sup>* mice. Genotyping  
92 was performed for all strains according to EUCOMM® instructions<sup>2,3</sup>. According to EUCOMM  
93 terminology, *tm2c* symbolizes the transgenic mice with the floxed gene.

94

95 **Serum postprandial blood glucose, triglycerides and total cholesterol measurements:**  
96 For serum postprandial blood glucose, triglycerides and total cholesterol, samples were  
97 measured by the Central Laboratory of Johannes Gutenberg Medical Center, in Mainz, using  
98 an automated analyzer Alinity ci-series (Abbott Core Laboratory - Abbott Diagnostics). Results  
99 were expressed as mg/dl.

100

101 **Angiotensin II infusion:** In selected experiments, mice were infused with Angiotensin II  
102 (AngII) (1 mg/kg/d for 7 days) via subcutaneously implanted osmotic mini-pumps (model  
103 1007D, ALZET; dorsal implantation between the scapulae); sham-operated mice, implanted  
104 with osmotic mini-pumps fill with solvent (saline) served as controls<sup>9</sup>. For pump implantation,  
105 mice initially administered buprenorphine (0.075 mg/kg i.p.) 30' prior to the surgery and were  
106 subsequently anesthetized with a mixture of medetomidine (500µg/kg), fentanyl (50µg/kg) and  
107 midazolam (5mg/kg). As an antidote to the anesthesia, atipamezol (2.5mg/kg) and flumazenil  
108 (0.5 µg/kg) were administered to the mice, which rapidly gained consciousness<sup>10</sup>. The very  
109 well established s.c. administration of AngII as a common hypertensive stimulus was selected  
110 in the *in vivo* studies to model vascular and cardiac dysfunction, which is representative of the  
111 hypertensive phenotype in clinical practice. The one-week administration of AngII at the  
112 selected dose was previously shown to induce hypertension in mice<sup>10</sup>.

113

114 **Vascular Relaxation and Constriction studies:** To assess vasodilator potential of isolated  
115 aortic segments (3 mm), they were mounted to force transducers in organ chambers to test  
116 their response to acetylcholine (ACh) and nitroglycerine (Glycerol trinitrate, GTN). The aortic  
117 rings were pre-constricted with prostaglandin F2 α (PGF2α, 3 nM), a VSMC-dependent  
118 constrictor<sup>11</sup>) to reach 50 to 80% of the tone induced by KCl. Concentration-relaxation curves  
119 were recorded in response to the endothelium-dependent vasodilators ACh (1 nM to 3 mM)  
120 and GTN (1 nM to 30 mM)<sup>9</sup>.

121

122 **Ultrasound evaluation of cardiac, aortic and carotid function:** Ultrasound evaluation was  
123 performed in anesthesia using a VEVO3100 high-resolution imaging system (VisualSonics®,  
124 FujiFilm, Toronto, CA). Mice were anesthetized with isoflurane (1.2 to 1.5 Vol %). Left  
125 ventricular function was analyzed in sham and Ang-II treated mice. Equipped with a 38 MHz  
126 (MZ400) linear array transducer, images were acquired at a frame rate consistently above 200  
127 frames. ECG and breathing rate were monitored, body temperature was kept at 37 °C using  
128 a heating system within the handling platform. In addition, an infrared warming lamp was used  
129 when required. Brightness (B)-mode movies and Motion (M)-mode of the parasternal long axis  
130 (PLAX) and parasternal short axis (SAX, mid-ventricular) were acquired. Post-acquisition  
131 analysis was performed with the VevoLab Software (VisualSonics®, FujiFilm, Toronto, CA).

132 Left ventricular ejection fraction (LVEF) and Left ventricular end-diastolic volume (LVEDV)  
133 were calculated from B-Mode images in PLAX<sup>10</sup>. For aortic diameters, ascending and  
134 transverse aortic sections were measured according to the literature<sup>12</sup>.

135

136 **Histology:** Aortic sections (3 mm) were fixed in 4% zinc formaline for 24 h and subsequently  
137 sliced in 5 µm-thick cross-sections. Slides were de-paraffinized in xylene and rehydrated in  
138 serial ethanol concentrations. Sections were stained with hematoxylin and eosin or Sirius Red  
139 to histologically evaluate vessel wall thickness and collagen deposition, respectively<sup>13</sup>. For  
140 the assessment of the wall thickness, aortic media thickness (internal elastic lamina to the  
141 adventitial border<sup>14</sup>) was taken under consideration, as observed by brightfield microscopy  
142 after hematoxylin eosin staining. Collagen thickness was measured under polarized  
143 microscopy so that the red signal of the staining would be sharper and well defined. At least  
144 10 individual areas of the pictures were measured among the vascular wall and results were  
145 averaged per animal into one n value. Collagen thickness was expressed as a ratio to the  
146 media thickness<sup>15</sup>, namely as Collagen to media thickness. Media and collagen thickness  
147 were measured using ImageJ software and by taking under consideration the scale and  
148 magnification of the images. For immunofluorescence (IF) experiments, aortic sections were  
149 frozen in OCT medium (Tissue-Tek® O.C.T.™ Compound, Fisher Scientific) and sliced in 3  
150 µm-thick cryosections.

151

152 **Blood pressure assessment:** For the measurement of arterial diastolic and systolic blood  
153 pressure, mice underwent a non-invasive tail-cuff blood pressure assessment using the Coda  
154 Monitor System (Kent Scientific)<sup>9</sup>.

155

156 **Quantitative Real-Time PCR:** For isolation of RNA, snap-frozen mouse aortas were  
157 pulverized and extracted using the standardized Trizol protocol. RT-PCR was performed with  
158 the CFX96 Real-Time PCR Detection System (Bio-Rad, Munich, Germany). Isolated RNA was  
159 reverse-transcribed to cDNA using high-capacity cDNA reverse transcription kit (#4368813,  
160 Thermo Fisher Scientific). TaqMan Gene Expression Assays were used as the probe and  
161 primer sets (Applied Biosystems, Foster City, CA) for Actb (Mm00607939\_s1), Ccl2  
162 (Mm00441242\_m1), Cd68 (Mm03047340\_m1), Cybb (Mm00432775\_m1), Il6  
163 (Mm00446190\_m1), Il1β (Mm00434228\_m1), Gapdh (Mm99999915\_g1), Lcn2  
164 (Mm01324470\_m1), Ly6c1+2 (Mm03009946\_m1), Mmp2 (Mm00439498\_m1), Mmp9  
165 (Mm00442991\_m1), Nos2 (Mm00440485\_m1), Nos3 (Mm00435204\_m1), Nox4  
166 (Mm00627696\_m1), Tgfβ (Mm01298616\_m1), Tnfa (Mm00443260\_g1), Vcam-1  
167 (Mm00449197\_m1) and Vegf (Mm01281449\_m1). Primers for Tbc1e (F:  
168 GGAGGCTCTTTTGTTCGTCC, R: TCGAGCACATAGCGCTTCTT), Tub1A (F:

169 TGTATGTGGCAATGTGTGCT, R: TGAAATGGGCAGCTTGGGTC), *Cdh5* (F:  
170 GCTGGAGATTCACGAGCAGT, R: CCACCGCGCACAGAATTAAG), *Gapdh* (F:  
171 TACCCCAATGTGTCCGTCGTC R: CCTTCAGTGGGCCCTCAGATGC) were analyzed by  
172 the standardized SYBR®Green method (Applied Biosystems, Thermo Fisher) according to  
173 the manufacturer's instructions <sup>9</sup>.

174 For the human *Tbce* mRNA expression analysis in Figure 1B concerning the peripheral blood  
175 mononuclear cells from the 5000 individuals the following primers were used TBCE:  
176 Hs001625\_m1 and TBP: Hs00427620\_m1 (TaqMan™; Applied Biosystems) as described  
177 above.

178 For RT-PCR analysis of the *LysMCre<sup>+/-</sup>TBCE<sup>tm2c</sup>* peripheral blood mononuclear cells (PBMCs),  
179 spleen and aorta the following primers were used: Eukaryotic translation initiation factor 2  
180 alpha kinase 3 (*eif2ak3*; F: GCATCGTAGCCACGACCTTC, R: TCAGACTCCTTCCGCCTG),  
181 musculus endoplasmic reticulum (ER) to nucleus signaling 1 (*ern1*; F:  
182 GCAGCAGACTTTGTCATCGG, R: GGTGATGGTGTATTCTGTCCGT), calnexin (*canx*, F:  
183 ACCGGAAGCCTGAAGATTGG, R: TGGGATCTTAGAAGGGGCGT), protein disulfide  
184 isomerase associated 3 (*pdia3*; F: AGCAGGACCAGCTTCAGTTC, R:  
185 AAAAACCACCACTGAGGCA), DNA-damage inducible transcript 3 (*Ddit3*; F:  
186 CCTGAGGAGAGAGTGTTCAG, R: GACCAGGTTCTGCTTTCAGGT), NLR family, pyrin  
187 domain containing 3 (*nlrp3*; F: CCTTGGACCAGGTTCAAGTGT, R:  
188 CAGCAGTTCACCAGTCTGGAA), NLR family, pyrin domain containing 1A (*nlrp1a*, F:  
189 CCAATGGCCATCTGAGTTTCC, R: GGGAAAGGCCAAAAGGGATCA). RT-PCR analysis was  
190 performed by the standardized SYBR®Green method (Applied Biosystems, Thermo Fisher)  
191 according to the manufacturer's instructions <sup>9</sup>

192

193 **Primary Pulmonary Endothelial Cell isolation:** Primary mouse endothelial cells were  
194 isolated from *Tie2-ERT2Cre<sup>+/-</sup>TBCE<sup>wt/wt</sup>* and *TBCE<sup>fl/fl</sup>* mouse lungs using magnetic cell sorting  
195 (MACS) following CD45<sup>-</sup>/CD31<sup>+</sup> (Miltenyi Biotec) selection as described <sup>16</sup>. Mice were  
196 sacrificed by cervical dislocation under deep anesthesia with isoflurane. Primary endothelial  
197 cells were cultivated in Endothelial Cell Growth Medium 2 (PromoCell) according to the  
198 manufacturer's instructions.

199

200 **Primary Vascular Smooth Muscle Cell isolation:** Mouse aortas were aseptically prepared  
201 and perivascular adipose tissue was removed. Aortas were cut in 1 mm rings and digested for  
202 5-6 h in Dulbecco's Modified Eagle's Medium [DMEM, 10% Fetal Bovine Serum (FBS)]  
203 supplemented with collagenase type II (1.42 mg/mL, # S8N10850, Worthington). The  
204 digestion mixture was plated on a 6-well plate for 5 days until VSMCs were confluent, and  
205 cells were then subsequently divided according to the experiments <sup>17</sup>. Mice were sacrificed by

206 cervical dislocation under deep anesthesia with isoflurane. Vascular Smooth Muscle Cells  
207 were cultivated in Smooth Muscle Cell Growth Medium 2 (PromoCell) according to the  
208 manufacturer's instructions.

209

210 **siRNA transfection of Human Aortic Smooth Muscle cells:** Primary Human Aortic Smooth  
211 Muscle Cells (HAoSMCs, PromoCell) were seeded in 75 mL flasks in optimal Smooth muscle  
212 cell growth medium (Smooth muscle cell growth medium kit 2, PromoCell) until they reached  
213 confluency. Cells were seeded in 96-well plates for the investigation of proliferation rate and  
214 in 24-well plates for staining, at a cell number of  $6 \times 10^3$  and  $4 \times 10^4$  cells per well, respectively.  
215 Transfection with TBCE siRNA (10  $\mu$ M, EHU021091, Sigma Aldrich) or siRNA Fluorescent  
216 Universal Negative Control (NgCTL, 10  $\mu$ M, SIC004, Sigma Aldrich) was performed by the  
217 siPORT™ NeoFX™ Transfection Agent (AM4510, Thermo Fisher Scientific) for 24 h  
218 according to the manufacturer's instructions.

219

220 **MTT proliferation assay:** VSMCs were plated at a density of  $6 \times 10^3$  cells/well in 96-well plates.  
221 Cells were allowed to adhere and treated with AngII (100 nM) for 24 h in the respective groups,  
222 while controls were incubated in DMEM as vehicle. Subsequently, cells were incubated with  
223 MTT solution [3-(4,5-dimethylthiazol-2-yl)-2,5-diphenyl tetrazolium bromide] (#M-5655, Sigma  
224 Aldrich) at a final concentration of 0.5 mg/mL for 4 h at 37 °C. The medium was then aspirated  
225 and the formed formazan debris solubilized in dimethylsulfoxide (DMSO). Absorbance was  
226 measured at 570 nm (reference wavelength 690 nm) in a microplate spectrophotometer  
227 (Tecan Spark, Tecan Inc.).

228

229 **Western blot analysis:** Aortic tissue powder or cells were extracted with lysis buffer (1%  
230 Triton X-100, 20 mM Tris pH 7.4-7.6, 150 mM NaCl, 50 mM NaF, 1 mM EDTA, 1 mM EGTA,  
231 1 mM Glycerolphosphatase, 1% SDS, 100 mM phenylmethylsulfonyl fluoride, and 0.1%  
232 protease phosphatase inhibitor cocktail). After centrifugation (11,000 x g, 15 min, 4 °C),  
233 supernatants were used for protein analysis, as previously described<sup>18</sup>. The following primary  
234 antibodies were used: NLRP3 (D4D8T) (Rabbit mAb, #15101), NLRC4 (D5Y8E) (Rabbit mAb,  
235 #12421), Cleaved Caspase-1 (Asp297) (D57A2) (Rabbit mAb, #4199),  $\beta$ -tubulin (Rabbit mAb  
236 , #2146), Calnexin (C5C9) (Rabbit mAb, #2679), IRE1 $\alpha$  (14C10) (Rabbit mAb, #3294), PDI  
237 (C81H6) (Rabbit mAb, #3501), CHOP (L63F7) (Mouse mAb, #2895), PERK (D11A8) (Rabbit  
238 mAb, #5683), Bip (C50B12) (Rabbit mAb, #3177), Beclin-1 (D40C5) (Rabbit mAb, #3495),  
239 LC3B (D11) (Rabbit mAb, #3868), pmTOR (Ser2448) (D9C2) (Rabbit mAb #5536), mTOR  
240 (7C10) (Rabbit mAb, #2983), p-Raptor (Ser792) (Rabbit mAb #2083), Raptor (24C12) (Rabbit  
241 mAb #2280), GAPDH (D16H11) (Rabbit mAb, #5174) (Cell Signaling Technology), TBCE  
242 (Rabbit pAb, #NBP1-81713, Novus Biologicals) and eNOS (Mouse mAb, # 610297 BD

243 Biosciences). PVDF membranes were then incubated with secondary antibodies for 2 h at  
244 room temperature [goat anti-mouse (#7076) and goat anti-rabbit HRP (#7074); Cell Signaling  
245 Technology, Beverly, MA, USA] and developed using the GE Healthcare ECL Western Blotting  
246 Detection Reagents (Thermo Scientific Technologies). Relative densitometry was determined  
247 using a computerized software package (NIH, USA), and relative ratios were used for  
248 statistical analysis <sup>18</sup>.

249

250 **Murine and human Peripheral Blood Mononuclear Cells Isolation:** For peripheral blood  
251 mononuclear cells (PBMCs) isolation, whole blood was collected in EDTA-tubes and  
252 subsequently cells were isolated using the Lymphoprep™ solution (STEMCELL  
253 Technologies) according to the manufacturer's instruction.

254

255 **Renal tissue analysis and confocal imaging:** For glomeruli microcirculation imaging, kidney  
256 samples from SMMHC-ERT2Cre<sup>+/-</sup>TBCE<sup>tm2c</sup> and Tie2-ERT2-Cre<sup>+/-</sup>TBCE<sup>tm2c</sup> mice were  
257 embedded in OCT medium. Subsequently cryosections (10 μm) were generated in a cryotome  
258 and slides were stained against α-smooth muscle actin (αSMA), TBCE and DAPI. Glomeruli  
259 structures were identified under brightfield observation of the slide and also as areas of dense  
260 DAPI signal which is not evident in renal tubules. At least 6 images per slide were generated  
261 and data were averaged per sample and presented as one n value.

262

263 **Confocal microscopy:** Cells were washed once with PBS and fixed in 4% PFA. Afterwards  
264 cells were permeabilized with 0.1% TritonX in PBS, and non-specific binding of the antibodies  
265 was blocked by incubation for 1 h in 1% BSA-0.01% Tween-80 in PBS. Cryosections were  
266 fixed with 4% PFA, permeabilized with 0.25% TritonX in PBS and blocked with 3% BSA-0.01%  
267 Tween-80 in PBS. Subsequently, samples were incubated with TBCE (Rabbit pAb, #NBP1-  
268 81713, Novus Biologicals), α-tubulin (Mouse mAb, # A11126 Thermo Fisher Scientific)  
269 calnexin (C5C9) (Rabbit mAb, #2679, Cell Signaling Technology), CD31 (Rat mAb, #DIA-310,  
270 Dianova), α-Smooth Muscle actin/α-SMa (Mouse mAb, # ab7817, Abcam). Primary antibodies  
271 were incubated overnight, washed off with PBS and subsequently anti-rabbit/Alexa-Fluor 647  
272 (Donkey, # ab150079, Abcam), anti-mouse/Alexa-Fluor 647 (Donkey, #ab150107, Abcam)  
273 and anti-rat/Alexa-Fluor 594 (Donkey, #ab150160, Abcam) conjugated secondary antibodies  
274 were added. After washing twice in PBS, specimens were treated with anti-fade mount  
275 medium containing DAPI (P36962, Thermo Fisher Scientific) and visualized in a confocal  
276 laser-scanning microscope (Leica SP8 confocal microscope, 63×, oil immersion objective). Z  
277 stacks were obtained and 3D images were generated using Fiji-Image J software<sup>2</sup> <sup>18</sup>. At least  
278 6 different areas were imaged per slide and results were averaged into one n value. Images  
279 to be quantified were acquired and exported in 12-bit grayscale format and aberrations were



280 corrected using Fiji-Image J software. Relative quantitation was performed in images with  
281 even illumination across the field. Control slides with positive signal for each fluorophore were  
282 used for each staining to apply corrections. Constant acquisition settings were maintained  
283 among the samples with the same staining. The lowest laser power that provided a sufficient  
284 signal-to-noise ratio was used in every imaging. Fluorophore intensity was represented as  
285 integrated fluorescence density in the figures and was normalized to the DAPI signal of the  
286 respective image. Acquisition of the images were performed according to confocal microscopy  
287 guidelines <sup>19</sup>.

288

289 **Flow cytometric analysis:** Aortas were isolated from mice and prepared free from  
290 perivascular adipose tissue. Aortas were shredded mechanically with razor blades and  
291 consecutively digested using a Liberase TM mixture (1mg/ml RPMI medium, Roche) for 30  
292 minutes at 37 °C. Cell solutions were passed over 70 µm nylon cell strainers and flushed with  
293 PBS/FCS (2%). Aortic cells were incubated with anti-CD-16/CD-32 to prevent unspecific  
294 antibody binding. Afterward, cells were washed and incubated with viability dye and  
295 fluorophore-labeled antibodies against surface epitopes of cells: viability dye, eFluor 506,  
296 eBioscience; anti-CD45.2 APC-Cy7, eBioscience; CD31, PE, Biolegend; CD11b, PE-Cy7,  
297 eBioscience; Ly6G, FITC, Biolegend; Ly6C, Pacific Blue, BD Bioscience; F4/80, APC,  
298 Biolegend; CD19 PerCP, Biolegend; CD90.2, APC-Cy7, eBioscience. The stained cell  
299 solutions were acquired using a FACS Canto II flow cytometer (BD Bioscience) and analyzed  
300 using FlowJo Software (BD Bioscience).

301

302 **TUDCA in vivo and in vitro experiments:** In vivo: SMMHC-ERT2Cre<sup>+/+</sup>-TBCE<sup>tm2c</sup> mice were  
303 fed *ad libitum* with tamoxifen food, as stated above for 6 weeks (**Figure S2**). During the 4<sup>th</sup>  
304 week of their tamoxifen diet, Tauroursodeoxycholic acid (TUDCA; #14605-22-2, Cayman  
305 Chemical, USA) was administered daily via oral gavage at a dose of 300 mg/kg body weight  
306 <sup>20</sup>, dissolved in normal saline (250 µL/mouse) for 10 days. Control mice received an equal  
307 volume of normal saline. At the end of the 10-day treatment, animals were sacrificed by  
308 isoflurane overdose and whole blood as well as aortic samples were obtained. In vitro:  
309 Primary VSMCs from SMMHC-ERT2Cre<sup>+/+</sup>-TBCE<sup>fl/fl</sup> mice were isolated <sup>17</sup> and seeded at a  
310 plating number of 6 x 10<sup>3</sup> cells per well in a 96 well plate. Cells were allowed to attach and  
311 then treated either with starvation medium (DMEM, 1% FCS, 1% PenStrep) or with TUDCA  
312 (dissolved in starvation medium) at a concentration of 1 mM for 24 h <sup>21</sup>. Subsequently, cellular  
313 viability was assessed using the MTT assay.

314

315 **Statistical Analysis:** Data are presented as means ± SD. Continuous variables were  
316 compared among groups using One-way analysis of variance (ANOVA) and post hoc

317 comparisons were made using Tukey's test, while comparisons concerning the ACh- and Gtn-  
318 relaxation and tension data were analyzed by Two-way analysis of variance (ANOVA) and  
319 Tukey's test. For the calculation of P values, no assumption of equal variability of differences  
320 was performed and data were corrected with Geisser-Greenhouse correction. A value of  
321  $P < 0.05$  was considered statistically significant (\* $P < 0.05$ , \*\* $P < 0.01$ , \*\*\* $P < 0.005$  and  
322 \*\*\*\* $P < 0.001$ ). All statistical analyses and graph preparation were performed using GraphPad  
323 Prism 8 5 analysis software (GraphPad Software, Inc., La Jolla, CA). No outliers due to  
324 biological diversity were excluded. Samples that did not meet our technical criteria (i.e., poor  
325 staining, low mRNA or protein content) were not included into the analyses *a priori*. The  
326 confirmation of the absence of outlying values was confirmed by GraphPad Prism analysis  
327 software, using ROUT method and  $Q = 1\%$ . Complete statistical analysis is included in an  
328 additional supplemental file.

329

330

331

## 332 **Supplementary References**

- 333 1. Panova-Noeva M, Schulz A, Hermanns MI, Grossmann V, Pefani E, Spronk HM,  
334 Laubert-Reh D, Binder H, Beutel M, Pfeiffer N, Blankenberg S, Zeller T, Munzel T, Lackner  
335 KJ, Ten Cate H, Wild PS. Sex-specific differences in genetic and nongenetic determinants of  
336 mean platelet volume: results from the Gutenberg Health Study. *Blood* 2016;**127**(2):251-9.
- 337 2. Coleman JL, Brennan K, Ngo T, Balaji P, Graham RM, Smith NJ. Rapid Knockout  
338 and Reporter Mouse Line Generation and Breeding Colony Establishment Using EUCOMM  
339 Conditional-Ready Embryonic Stem Cells: A Case Study. *Front Endocrinol (Lausanne)*  
340 2015;**6**:105.
- 341 3. Skarnes WC, Rosen B, West AP, Koutsourakis M, Bushell W, Iyer V, Mujica AO,  
342 Thomas M, Harrow J, Cox T, Jackson D, Severin J, Biggs P, Fu J, Nefedov M, de Jong PJ,  
343 Stewart AF, Bradley A. A conditional knockout resource for the genome-wide study of mouse  
344 gene function. *Nature* 2011;**474**(7351):337-42.
- 345 4. Liput DJ. Cre-Recombinase Dependent Germline Deletion of a Conditional Allele in  
346 the Rgs9cre Mouse Line. *Front Neural Circuits* 2018;**12**:68.
- 347 5. Clausen BE, Burkhardt C, Reith W, Renkawitz R, Forster I. Conditional gene  
348 targeting in macrophages and granulocytes using LysMcre mice. *Transgenic Res*  
349 1999;**8**(4):265-77.
- 350 6. Forde A, Constien R, Grone HJ, Hammerling G, Arnold B. Temporal Cre-mediated  
351 recombination exclusively in endothelial cells using Tie2 regulatory elements. *Genesis*  
352 2002;**33**(4):191-7.
- 353 7. Wirth A, Benyo Z, Lukasova M, Leutgeb B, Wettschureck N, Gorbey S, Orsy P,  
354 Horvath B, Maser-Gluth C, Greiner E, Lemmer B, Schutz G, Gutkind JS, Offermanns S.  
355 G12-G13-LARG-mediated signaling in vascular smooth muscle is required for salt-induced  
356 hypertension. *Nat Med* 2008;**14**(1):64-8.
- 357 8. Kilkenny C, Browne W, Cuthill IC, Emerson M, Altman DG, National Centre for the  
358 Replacement R, Reduction of Animals in R. Animal research: reporting in vivo experiments--  
359 the ARRIVE guidelines. *J Cereb Blood Flow Metab* 2011;**31**(4):991-3.
- 360 9. Kossmann S, Lagrange J, Jackel S, Jurk K, Ehlken M, Schonfelder T, Weihert Y,  
361 Knorr M, Brandt M, Xia N, Li H, Daiber A, Oelze M, Reinhardt C, Lackner K, Gruber A,  
362 Monia B, Karbach SH, Walter U, Ruggeri ZM, Renne T, Ruf W, Munzel T, Wenzel P.  
363 Platelet-localized FXI promotes a vascular coagulation-inflammatory circuit in arterial  
364 hypertension. *Sci Transl Med* 2017;**9**(375).
- 365 10. Molitor M, Rudi WS, Garlapati V, Finger S, Schuler R, Kossmann S, Lagrange J,  
366 Nguyen TS, Wild J, Knopp T, Karbach SH, Knorr M, Ruf W, Munzel T, Wenzel P. Nox2+  
367 Myeloid cells drive vascular inflammation and endothelial dysfunction in heart failure after  
368 myocardial infarction via angiotensin II receptor type 1. *Cardiovasc Res* 2020.

- 369 11. Lockette WE, Webb RC, Bohr DF. Prostaglandins and potassium relaxation in  
370 vascular smooth muscle of the rat. The role of Na-K ATPase. *Circ Res* 1980;**46**(5):714-20.
- 371 12. Sawada H, Chen JZ, Wright BC, Moorleghen JJ, Lu HS, Daugherty A. Ultrasound  
372 Imaging of the Thoracic and Abdominal Aorta in Mice to Determine Aneurysm Dimensions. *J*  
373 *Vis Exp* 2019(145).
- 374 13. Brandt M, Giokoglu E, Garlapati V, Bochenek ML, Molitor M, Hobohm L, Schonfelder  
375 T, Munzel T, Kossmann S, Karbach SH, Schafer K, Wenzel P. Pulmonary Arterial  
376 Hypertension and Endothelial Dysfunction Is Linked to NADPH Oxidase-Derived Superoxide  
377 Formation in Venous Thrombosis and Pulmonary Embolism in Mice. *Oxid Med Cell Longev*  
378 2018;**2018**:1860513.
- 379 14. Wheeler JB, Mukherjee R, Stroud RE, Jones JA, Ikonomidis JS. Relation of murine  
380 thoracic aortic structural and cellular changes with aging to passive and active mechanical  
381 properties. *J Am Heart Assoc* 2015;**4**(3):e001744.
- 382 15. Bhatta A, Yao L, Toque HA, Shatanawi A, Xu Z, Caldwell RB, Caldwell RW.  
383 Angiotensin II-induced arterial thickening, fibrosis and stiffening involves elevated arginase  
384 function. *PLoS One* 2015;**10**(3):e0121727.
- 385 16. Bochenek ML, Leidinger C, Rosinus NS, Gogiraju R, Guth S, Hobohm L, Jurk K,  
386 Mayer E, Munzel T, Lankeit M, Bosmann M, Konstantinides S, Schafer K. Activated  
387 Endothelial TGFbeta1 Signaling Promotes Venous Thrombus Nonresolution in Mice Via  
388 Endothelin-1: Potential Role for Chronic Thromboembolic Pulmonary Hypertension. *Circ Res*  
389 2020;**126**(2):162-181.
- 390 17. Adhikari N, Shekar KC, Staggs R, Win Z, Steucke K, Lin YW, Wei LN, Alford P, Hall  
391 JL, International Society of Cardiovascular Translational R. Guidelines for the isolation and  
392 characterization of murine vascular smooth muscle cells. A report from the International  
393 Society of Cardiovascular Translational Research. *J Cardiovasc Transl Res* 2015;**8**(3):158-  
394 63.
- 395 18. Efentakis P, Varela A, Chavdoula E, Sigala F, Sanoudou D, Tenta R, Gioti K,  
396 Kostomitsopoulos N, Papapetropoulos A, Tasouli A, Farmakis D, Davos CH, Klinakis A,  
397 Suter T, Cokkinos DV, Iliodromitis EK, Wenzel P, Andreadou I. Levosimendan prevents  
398 doxorubicin-induced cardiotoxicity in time- and dose dependent manner: Implications for  
399 inotropy. *Cardiovasc Res* 2019.
- 400 19. Jonkman J, Brown CM, Wright GD, Anderson KI, North AJ. Guidance for quantitative  
401 confocal microscopy. *Nat Protoc* 2020.
- 402 20. Rani S, Sreenivasaiah PK, Kim JO, Lee MY, Kang WS, Kim YS, Ahn Y, Park WJ,  
403 Cho C, Kim DH. Tauroursodeoxycholic acid (TUDCA) attenuates pressure overload-induced  
404 cardiac remodeling by reducing endoplasmic reticulum stress. *PLoS One*  
405 2017;**12**(4):e0176071.

406 21. Luo H, Zhou C, Chi J, Pan S, Lin H, Gao F, Ni T, Meng L, Zhang J, Jiang C, Ji Z, Lv  
407 H, Guo H. The Role of Tauroursodeoxycholic Acid on Dedifferentiation of Vascular Smooth  
408 Muscle Cells by Modulation of Endoplasmic Reticulum Stress and as an Oral Drug Inhibiting  
409 In-Stent Restenosis. *Cardiovasc Drugs Ther* 2019;**33**(1):25-33.

410

411

412 **Supplemental Figure Legends**

413 **Figure S1: Population Studies demonstrating TBCE single nucleotide polymorphisms.**

414 Identification of TBCE SNP **A.** rs6675944 and **B.** rs12405889 in population studies originating  
415 from worldwide databases. (Databases: Trans-Omics for Precision Medicine (TOPMed)  
416 Program, NHLBI established WGS project; Genome Aggregation Database (gnomAD); 1000  
417 Genomes Project, International Genome Sample Resource (IGSR); Tasa T et al. Eur J Human  
418 Genet. 27; 442–454, 2019; The Avon Longitudinal Study of Parents and Children project,  
419 Bristol UK; UK10K Rare Genetic Variants in Health and Disease project, Sanger Institute;  
420 <https://gtexportal.org>).

421

422 **Figure S2: Generation of the conditional TBCE knockdown mice. A.** Diagram of breeding

423 technique for generating the transgenic mice **B.** Table of PCR primers used for genotyping.  
424 Representative PCR gel images for generation of **C.** Tm1c mice **D.** LysMCre<sup>+/-</sup>TBCE<sup>tm2c</sup> mice  
425 **E.** Tie2-ERT2-Cre<sup>+/-</sup>TBCE<sup>tm2c</sup> **F.** SMMHC-ERT2-Cre<sup>+/-</sup>TBCE<sup>tm2c</sup>; according to EUCOMM  
426 terminology, tm2c symbolizes the transgenic mice with the floxed gene (e.g., TBCE<sup>fl/fl</sup> were  
427 homozygous TBCE<sup>tm2c</sup>). **G.** Workflow of the interventions performed on the conditional  
428 knockout mice.

429

430 **Figure S3: Survival rates and biometric analyses of the conditional TBCE knockdown**

431 **mice.** Kaplan-Meier curves of **A.** LysMCre<sup>+/-</sup>TBCE<sup>fl/fl</sup>, **B.** Tie2-ERT2-Cre<sup>+/-</sup>TBCE<sup>fl/fl</sup> and **C.**  
432 SMMHC-ERT2-Cre<sup>+/-</sup>TBCE<sup>fl/fl</sup> mice. **D.** Table of body weight (g), postprandial blood glucose  
433 (mg/dl), triglycerides (mg/dl) and total cholesterol (mg/dl) of the TBCE knockdown and  
434 C57bl/6J background control mice (n=6 per group; Tukey's multiple comparison test; One-way  
435 ANOVA of variances).

436

437 **Figure S4: TBCE knockdown in myeloid cells results in no significant vascular**

438 **phenotype in the LysMCre<sup>+/-</sup>TBCE<sup>fl/fl</sup> mice.** Representative graphs of **A.** (%) Relaxation and  
439 **B.** Tension (g) curves to ACh **C.** Maximal Contraction (g) to prostaglandin F2 α (PGF2α). **D.**  
440 (%) Relaxation and **E.** Tension (g) curves to GTN. Two-Way ANOVA, Tukey's multiple  
441 comparison test). **F.** Systolic blood pressure (mmHg) (n=6-9 per group). **G.** Sirius red  
442 (collagen) and Hematoxylin-Eosin staining of murine aortas and graphs of **H.** Media thickness  
443 (n=4 per group) and **L.** Collagen/Media thickness (μm) (n=4 per group); bars represent 20μm  
444 and images were gained at a 40x magnification (Tukey's multiple comparison test; One-way  
445 ANOVA of variances).

446

447 **Figure S5: TBCE regulation in renal microcirculation of Tie2-ERT2-Cre<sup>+/-</sup>TBCE<sup>fl/fl</sup>.**

448 Representative confocal images of renal microcirculation (glomeruli) and Integrated

449 fluorescence density graphs of TBCE/DAPI (normalized to ERT2-Cre<sup>+/+</sup>-TBCE<sup>wt/wt</sup>) of kidney  
450 samples of the Tie2-ERT2-Cre<sup>+/+</sup>-TBCE<sup>fl/fl</sup>. n=3 per group; Unpaired two-way Student's T-test;  
451 red:α-smooth muscle actin (α-SMA), green: TBCE, blue: DAPI and merged images of the  
452 channels; 40x magnification, white bar corresponds to 40µm.

453

454 **Figure S6: Tie2-ERT2-Cre<sup>+/+</sup>-TBCE<sup>fl/fl</sup> mice have an endothelial specific TBCE ablation in**  
455 **the aortas.** Representative immunofluorescence staining of Tie2-ERT2-Cre<sup>+/+</sup>-TBCE<sup>fl/fl</sup> aortas  
456 stained for DAPI (blue), TBCE (white) α-tubulin (red) (64x magnification, white bar represents  
457 20 µm).

458

459 **Figure S7: Endothelial TBCE deficiency leads to mildly increased vascular stiffness,**  
460 **and aortic wall thickening in response to AngII. (A-G)** Concentration-contraction/relaxation  
461 curves of isolated aortic rings. **A.** Maximal Contraction (g) in response to prostaglandin F2  
462 alpha (PGF2α). **B.** Vascular tension (g) curves in response to acetylcholine (ACh) or **C.**  
463 glycerol trinitrate (GTN) (Two-way ANOVA, Tukey's multiple comparison test). Vascular  
464 concentration-relaxation curves in response to ACh (**D** and **F**) and GTN of sham-operated (**D**  
465 and **F**) and AngII infused (1 mg/kg/day; **E** and **G**) mice (n=6-8 per group). **H.** Representative  
466 ultrasound images of B-Mode, M-Mode and PW Doppler of murine aortas and graphs of left  
467 common carotid artery (LCCA) **I.** Resistance index and **J.** Pulsatility index (n=5-6 per group).  
468 **K.** Sirius red (collagen) and hematoxylin-eosin staining of murine aortas and graphs showing  
469 the **L.** Media thickness (µm) (n=5-6 per group) and **M.** Collagen/Media thickness (n=4-6 per  
470 group) and; bars represent 20 µm and images were gained at 40x magnification (One-way  
471 ANOVA; Tukey's multiple comparison test).

472

473 **Figure S8: Inflammatory vascular response and induction of ER stress in Tie2-ERT2-**  
474 **Cre<sup>+/+</sup>-TBCE<sup>fl/fl</sup> mice. A.** RT-PCR data of mRNA expression of differentially regulated genes in  
475 the murine aortas (n=6 per group). Immunofluorescence images of **B.** murine aortas of AngII  
476 and sham infused Tie2-ERT2-Cre<sup>+/+</sup>-TBCE<sup>fl/fl</sup> versus control mice and **C.** isolated pulmonary  
477 endothelial cells of sham infused Tie2-ERT2-Cre<sup>+/+</sup>-TBCE<sup>fl/fl</sup> versus control mice (MPECs)  
478 with CD31 (red; endothelial marker), NLRP3 (green; inflammasome marker) and DAPI (blue;  
479 nuclear marker). Protein expression analysis of inflammasome and ER stress markers [protein  
480 kinase R (PKR)-like endoplasmic reticulum kinase (PERK); CCAAT/-enhancer-binding protein  
481 homologous protein (CHOP)] in murine primary endothelial cells (**D**, n=3 per group) and  
482 murine aortas (**E**, n=4-7 per group). Top: representative Western blot images; Bottom:  
483 Relative densitometry analysis. One-way ANOVA, Tukey's multiple comparison test).

484

485 **Figure S9: Tie2-ERT2Cre<sup>+/-</sup>TBCE<sup>fl/fl</sup> mice have a slightly augmented hypertensive**  
486 **phenotype in response AngII treatment.** Graphs of **A.** Systolic and Diastolic blood pressure  
487 (n=7-8 per group). **B.** Representative M-Mode echocardiography images and **C.** Graphs of  
488 echocardiographic parameters LV mass (mg), SAX, M-Mode; Heart Rate (bpm); LV-EF (%),  
489 B-Mode; SV (μl) PLAX, M-Mode; LV PW sys (mm) PLAX, M-Mode; LV PW dia (mm) PLAX,  
490 M-Mode of Tie2-ERT2Cre<sup>+/-</sup>TBCE<sup>wt/wt</sup> and Tie2-ERT2Cre<sup>+/-</sup>TBCE<sup>fl/fl</sup> mice treated with AngII  
491 (n=5-6 per group; AngII 1 mg/kg/day). (Tukey's multiple comparison test; One-way ANOVA of  
492 variances). *LV, left ventricle; SAX, Short-axis view; bpm, beats per minute; EF, Ejection*  
493 *fraction; SV, Stroke volume; PW, posterior wall; sys, systole; PLAX, Parasternal Long Axis;*  
494 *dia, diastole.*

495

496 **Figure S10: Endothelial specific TBCE knockout does not lead to significant aortic**  
497 **immune cell infiltration in Tie2-ERT2Cre<sup>+/-</sup>TBCE<sup>fl/fl</sup> mice. (A-B)** Flow cytometric analysis of  
498 isolated aortas from Tie2-ERT2Cre<sup>+/-</sup>TBCE<sup>fl/fl</sup> and Tie2-ERT2Cre<sup>+/-</sup>TBCE<sup>wt/wt</sup> control mice. **A.**  
499 Representative gating strategy of the Tie2-ERT2Cre<sup>+/-</sup>TBCE<sup>fl/fl</sup> aortas **B.** Quantification of cell  
500 populations from analyzed aortas. Cell number per cm aorta is shown, n = 7–9 mice per group.  
501 **C.** Representative plots of flow cytometric analysis. CD11b<sup>+</sup> cells (upper panel) were gated on  
502 living, CD45<sup>+</sup> cells and Ly6G<sup>+</sup>Ly6C<sup>+</sup> neutrophils and Ly6C<sup>+</sup>Ly6G<sup>-</sup> monocytic cells (lower panel)  
503 were gated on living, CD45<sup>+</sup>CD11b<sup>+</sup> cells.

504

505 **Figure S11: TBCE regulation in renal microcirculation and aortas of SMMHC-ERT2-Cre<sup>+/-</sup>**  
506 **TBCE<sup>fl/fl</sup> mice. (A-B)** Representative confocal images of renal microcirculation (glomeruli) and  
507 Integrated fluorescence density graphs of TBCE/DAPI (normalized to ERT2-Cre<sup>+/-</sup>TBCE<sup>wt/wt</sup>)  
508 of kidney samples of the SMMHC-ERT2-Cre<sup>+/-</sup>TBCE<sup>fl/fl</sup>. n=3 per group; Unpaired two-way  
509 Student's T-test; red:α-smooth muscle actin (α-SMA), green: TBCE, blue: DAPI and merged  
510 images of the channels; 40x magnification, white bar corresponds to 40μm. **C.** Representative  
511 immunofluorescence staining of SMMHC-ERT2-Cre<sup>+/-</sup>TBCE<sup>fl/fl</sup> aortas stained for DAPI (blue),  
512 TBCE (white) α-tubulin (red) (64x magnification, white bar represents 20 μm).

513

514 **Figure S12: TBCE deficiency does not affect aortic diameter at baseline but aggravates**  
515 **carotid wall thickness in response to AngII treatment in the SMMHC-ERT2-Cre<sup>+/-</sup>TBCE<sup>fl/fl</sup>**  
516 **mice. A.** Representative ultrasound images of the aortic arch (B-Mode, upper panel) and Left  
517 Common Carotid Artery (M-Mode, lower panel) of the sham- and AngII-treated SMMHC-  
518 ERT2-Cre<sup>+/-</sup>TBCE<sup>fl/fl</sup> mice. Graphs of **B.** Ascending (Asc), **C.** Transverse (trans) aorta diameter  
519 (mm) and **D.** Left Common Carotid Artery (LCCA) wall thickness (mm) (n=4-6 per group;  
520 Tukey's multiple comparison test; One-way ANOVA of variances).

521



522 **Figure S13: AngII leads to a hypertensive phenotype in both SMMHC-ERT2Cre<sup>+/-</sup>**  
523 **TBCE<sup>wt/wt</sup> and SMMHC-ERT2Cre<sup>+/-</sup>TBCE<sup>fl/fl</sup> mice independently of TBCE ablation, while**  
524 **AngII induced a mild cardiac dysfunction only in the SMMHC-ERT2Cre<sup>+/-</sup>TBCE<sup>fl/fl</sup> mice.**  
525 Graphs of **A.** Systolic and Diastolic blood pressure (n=5-6 per group). **B.** Representative M-  
526 Mode echocardiography images and **C.** Graphs of echocardiographic parameters LV mass  
527 (mg), SAX, M-Mode; Heart Rate (bpm); LV-EF (%), B-Mode; SV ( $\mu$ l) PLAX, M-Mode; LV PW  
528 sys (mm) PLAX, M-Mode; LV PW dia (mm) PLAX, M-Mode of SMMHC-ERT2Cre<sup>+/-</sup>TBCE<sup>wt/wt</sup>  
529 and SMMHC-ERT2Cre<sup>+/-</sup>TBCE<sup>fl/fl</sup> mice treated with AngII (n=5-6 per group; AngII 1  
530 mg/kg/day). (Tukey's multiple comparison test; 1way ANOVA of variances). *LV, left ventricle;*  
531 *SAX, Short-axis view; bpm, beats per minute; EF, Ejection fraction; SV, Stroke volume; PW,*  
532 *posterior wall; sys, systole; PLAX, Parasternal Long Axis; dia, diastole.*

533

534 **Figure S14: VSMCs-specific TBCE knockout does not lead to significant immune cell**  
535 **infiltration in the aortas of the SMMHC-ERT2Cre<sup>+/-</sup>TBCE<sup>fl/fl</sup> mice. (A-B) Flow cytometric**  
536 **analysis of isolated aortas from SMMHC-ERT2Cre<sup>+/-</sup>TBCE<sup>fl/fl</sup> and SMMHC-ERT2Cre<sup>+/-</sup>**  
537 **TBCE<sup>wt/wt</sup> control mice. A.** Representative gating strategy of the SMMHC-ERT2Cre<sup>+/-</sup>TBCE<sup>fl/fl</sup>  
538 aortas **B.** Quantification of cell populations from analyzed aortas. Cell number per cm aorta is  
539 shown, n = 5–10 mice per group. **C.** Representative plots of flow cytometric analysis. CD11b<sup>+</sup>  
540 cells (upper panel) were gated on living, CD45<sup>+</sup> cells and Ly6G<sup>+</sup>Ly6C<sup>+</sup> neutrophils and  
541 Ly6C<sup>+</sup>Ly6G<sup>-</sup> monocytic cells (lower panel) were gated on living, CD45<sup>+</sup>CD11b<sup>+</sup> cells.

542

543 **Supplemental Figures**

544 **Figure S1**

**A**

rs6675944

| Study                                               | Population              | Group      | Sample Size | Ref Allele | Alt Allele |
|-----------------------------------------------------|-------------------------|------------|-------------|------------|------------|
| TopMed                                              | Global                  | Study-wide | 125568      | T=0.51001  | C=0.48999  |
| gnomAD - Genomes                                    | Global                  | Study-wide | 30852       | T=0.5034   | C=0.4966   |
| gnomAD - Genomes                                    | European                | Sub        | 18442       | T=0.4811   | C=0.5189   |
| gnomAD - Genomes                                    | African                 | Sub        | 8692        | T=0.591    | C=0.409    |
| gnomAD - Genomes                                    | East Asian              | Sub        | 1608        | T=0.326    | C=0.674    |
| gnomAD - Genomes                                    | Other                   | Sub        | 974         | T=0.48     | C=0.52     |
| gnomAD - Genomes                                    | American                | Sub        | 834         | T=0.47     | C=0.53     |
| gnomAD - Genomes                                    | Ashkenazi Jewish        | Sub        | 302         | T=0.47     | C=0.53     |
| 1000Genomes                                         | Global                  | Study-wide | 5008        | T=0.499    | C=0.501    |
| 1000Genomes                                         | African                 | Sub        | 1322        | T=0.597    | C=0.403    |
| 1000Genomes                                         | East Asian              | Sub        | 1008        | T=0.346    | C=0.654    |
| 1000Genomes                                         | Europe                  | Sub        | 1006        | T=0.492    | C=0.508    |
| 1000Genomes                                         | South Asian             | Sub        | 978         | T=0.55     | C=0.45     |
| 1000Genomes                                         | American                | Sub        | 694         | T=0.48     | C=0.52     |
| Genetic variation in the Estonian population        | Estonian                | Study-wide | 4480        | T=0.450    | C=0.550    |
| The Avon Longitudinal Study of Parents and Children | Parent and Child Cohort | Study-wide | 3854        | T=0.516    | C=0.484    |
| UK 10K study - Twins                                | Twin Cohort             | Study-wide | 3708        | T=0.495    | C=0.505    |

**B**

rs12405889

| Study                                               | Population              | Group      | Sample Size | Ref Allele | Alt Allele |
|-----------------------------------------------------|-------------------------|------------|-------------|------------|------------|
| TopMed                                              | Global                  | Study-wide | 125568      | T=0.48898  | G=0.51102  |
| gnomAD - Genomes                                    | Global                  | Study-wide | 30878       | T=0.4882   | G=0.5118   |
| gnomAD - Genomes                                    | European                | Sub        | 18458       | T=0.4673   | G=0.5327   |
| gnomAD - Genomes                                    | African                 | Sub        | 8700        | T=0.576    | G=0.424    |
| gnomAD - Genomes                                    | East Asian              | Sub        | 1604        | T=0.323    | G=0.677    |
| gnomAD - Genomes                                    | Other                   | Sub        | 978         | T=0.47     | G=0.53     |
| gnomAD - Genomes                                    | American                | Sub        | 836         | T=0.40     | G=0.60     |
| gnomAD - Genomes                                    | Ashkenazi Jewish        | Sub        | 302         | T=0.44     | G=0.56     |
| 1000Genomes                                         | Global                  | Study-wide | 5008        | T=0.480    | G=0.520    |
| 1000Genomes                                         | African                 | Sub        | 1322        | T=0.594    | G=0.406    |
| 1000Genomes                                         | East Asian              | Sub        | 1008        | T=0.343    | G=0.657    |
| 1000Genomes                                         | Europe                  | Sub        | 1006        | T=0.481    | G=0.519    |
| 1000Genomes                                         | South Asian             | Sub        | 978         | T=0.51     | G=0.49     |
| 1000Genomes                                         | American                | Sub        | 694         | T=0.42     | G=0.58     |
| Genetic variation in the Estonian population        | Estonian                | Study-wide | 4480        | T=0.440    | G=0.560    |
| The Avon Longitudinal Study of Parents and Children | Parent and Child Cohort | Study-wide | 3854        | T=0.501    | G=0.499    |
| UK 10K study - Twins                                | Twin Cohort             | Study-wide | 3708        | T=0.477    | G=0.523    |

545

546

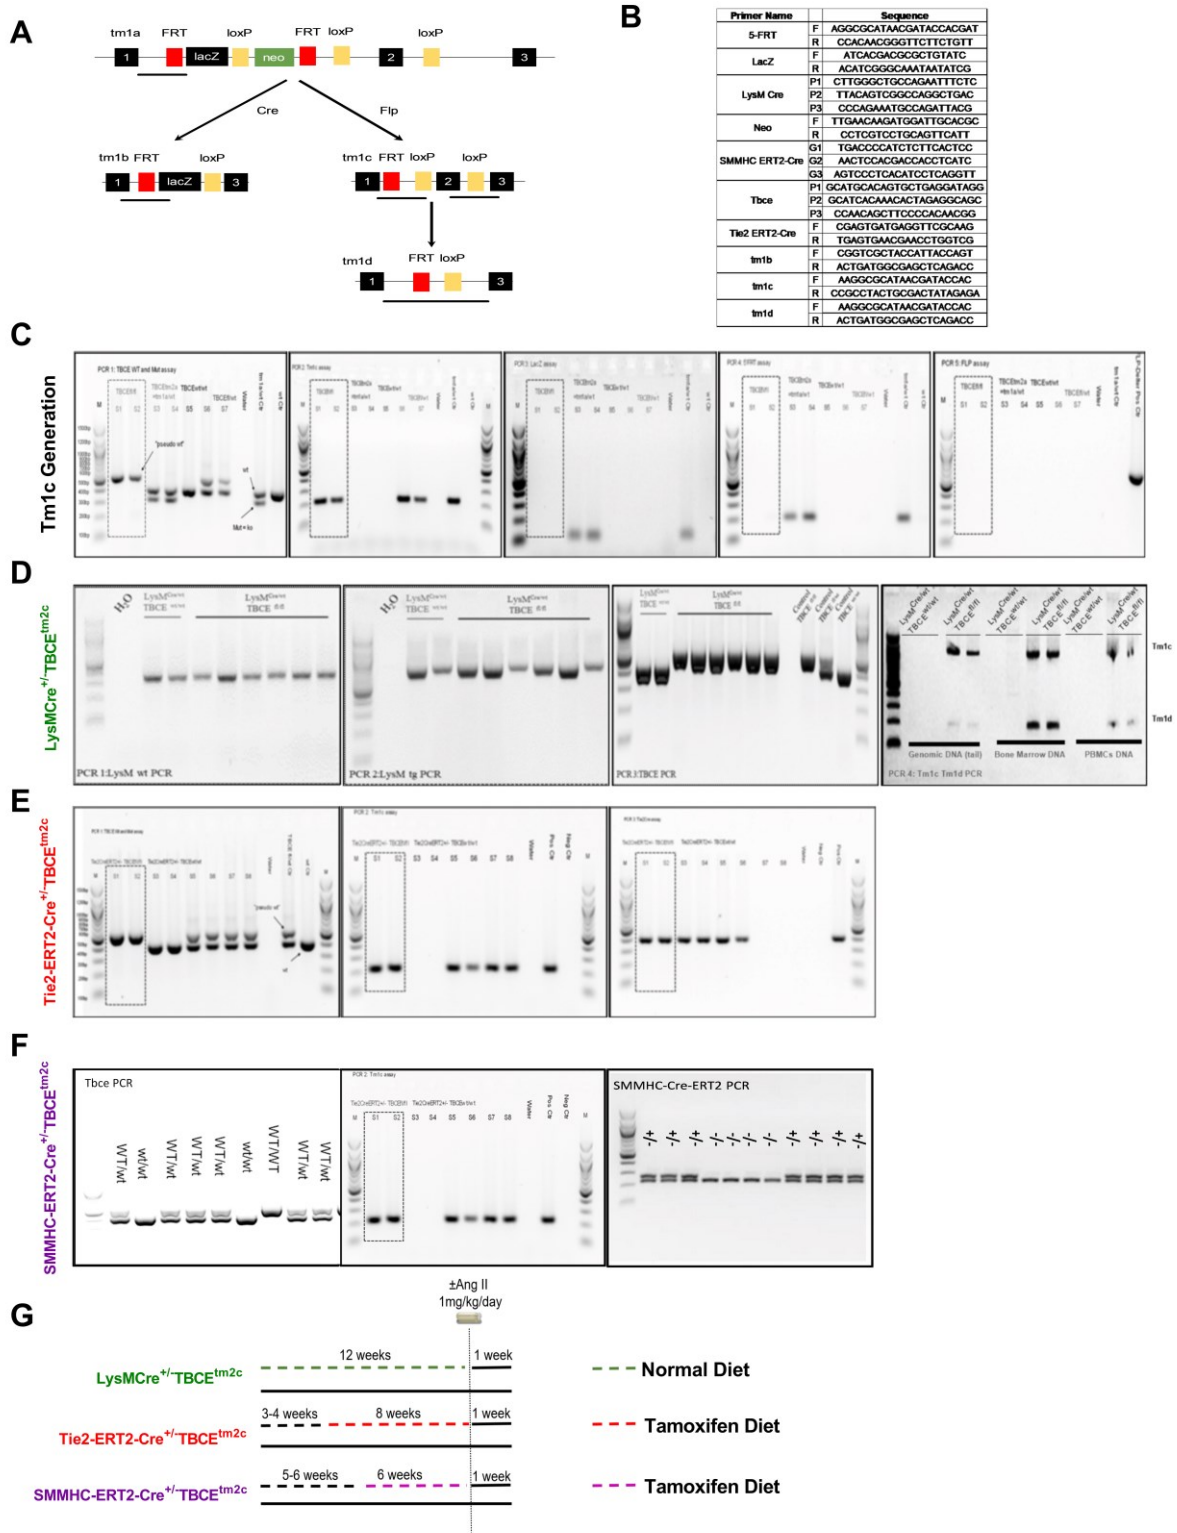

549 **Figure S3**

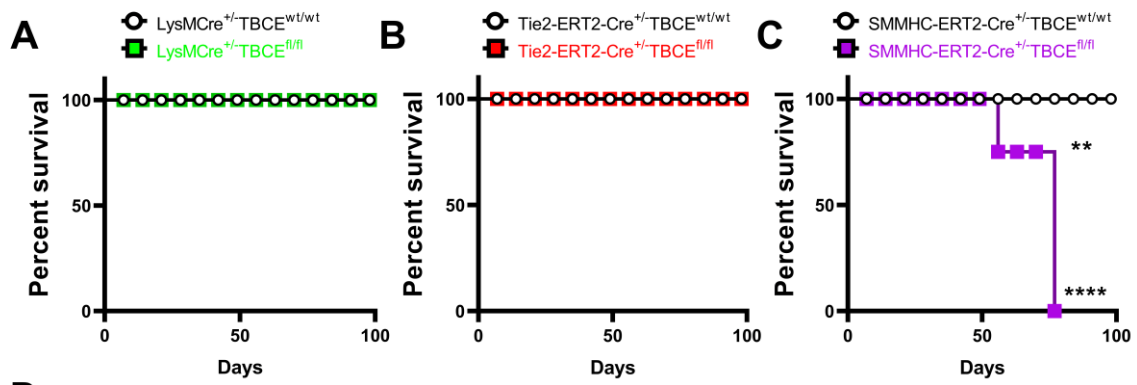

**D**

|                                  | C57BL/6J<br>(n=6) | LysMCre <sup>+/-</sup><br>TBCE <sup>wt/wt</sup><br>(n=6) | LysMCre <sup>+/-</sup><br>TBCE <sup>fl/fl</sup><br>(n=6) | Tie2-ERT2-Cre <sup>+/-</sup><br>TBCE <sup>wt/wt</sup><br>(n=6) | Tie2-ERT2-Cre <sup>+/-</sup><br>TBCE <sup>fl/fl</sup><br>(n=6) | SMMHC-ERT2-<br>Cre <sup>+/-</sup> TBCE <sup>wt/wt</sup><br>(n=6) | SMMHC-ERT2-<br>Cre <sup>+/-</sup> TBCE <sup>fl/fl</sup><br>(n=6) |
|----------------------------------|-------------------|----------------------------------------------------------|----------------------------------------------------------|----------------------------------------------------------------|----------------------------------------------------------------|------------------------------------------------------------------|------------------------------------------------------------------|
| <b>Body Weight (g)</b>           | 24.12±0.5         | 26.17±0.79                                               | 25.5±0.92                                                | 21.26±0.23 <sup>##</sup>                                       | 18.25±0.53 <sup>***###</sup>                                   | 18.72±0.48 <sup>####</sup>                                       | 19.49±0.54 <sup>###</sup>                                        |
| <b>Blood Glucose (mg/dl)</b>     | 149.4±3.8         | 110.0±3.9                                                | 122.0±22.5                                               | 149.6±13.2                                                     | 130.6±7.9                                                      | 128.8±12.6                                                       | 126.2±4.9                                                        |
| <b>Triglycerides (mg/dl)</b>     | 77.0±10.3         | 67.6±6.5                                                 | 82.4±12.87                                               | 72.4±10.7                                                      | 67.8±10.0                                                      | 102.4±14.8                                                       | 82.6±10.0                                                        |
| <b>Total Cholesterol (mg/dl)</b> | 57.2±1.8          | 59.6±4.2                                                 | 57.0±2.4                                                 | 37.8±5.7 <sup>#</sup>                                          | 40.4±5.6 <sup>#</sup>                                          | 40.8±4.9 <sup>##</sup>                                           | 35.2±1.5 <sup>###</sup>                                          |

550

551

552 **Figure S4**

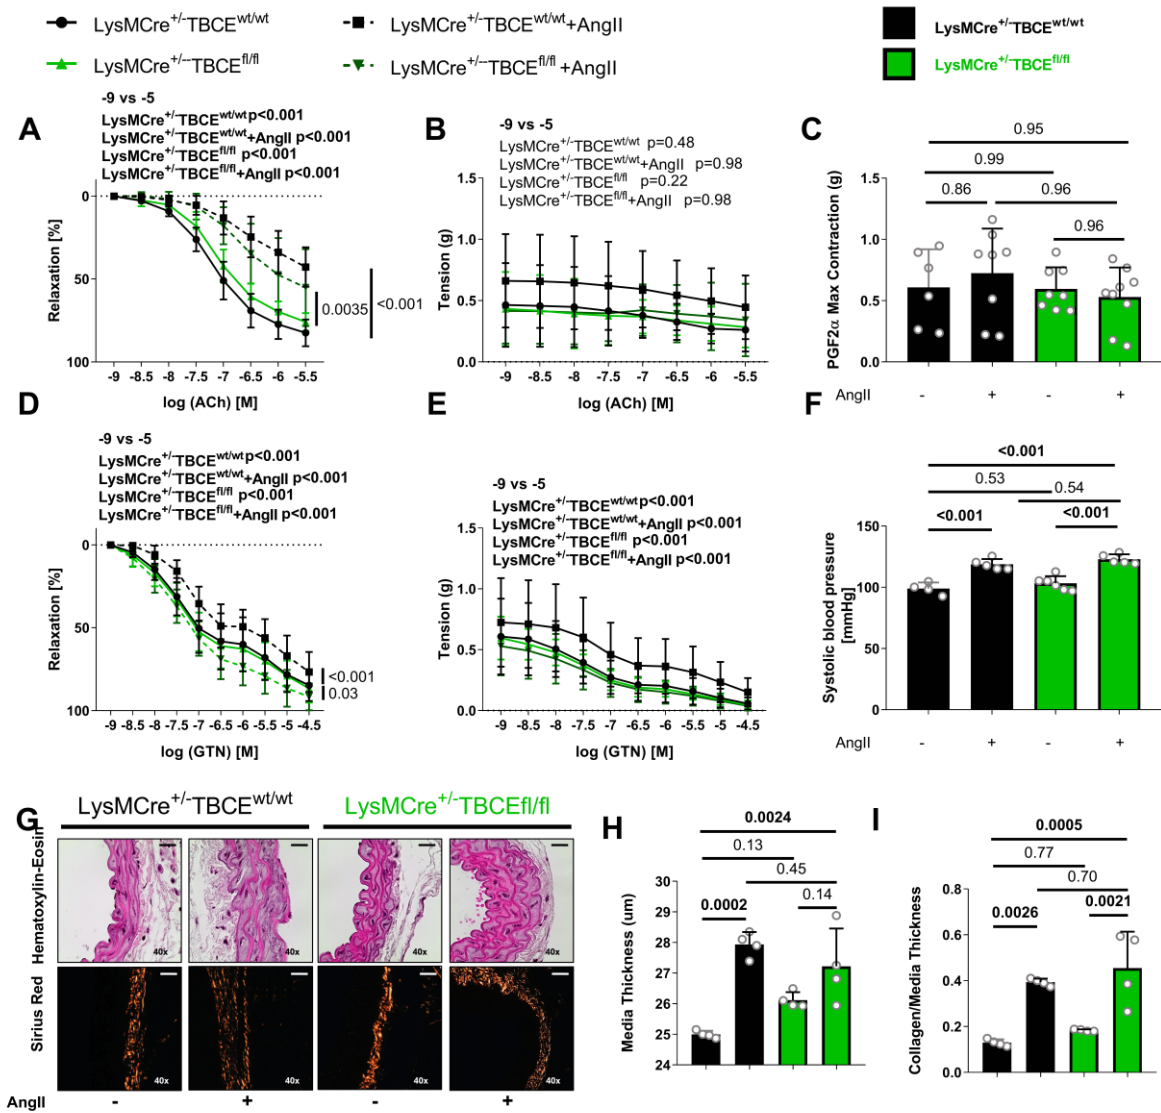

553

554

555 **Figure S5**

556

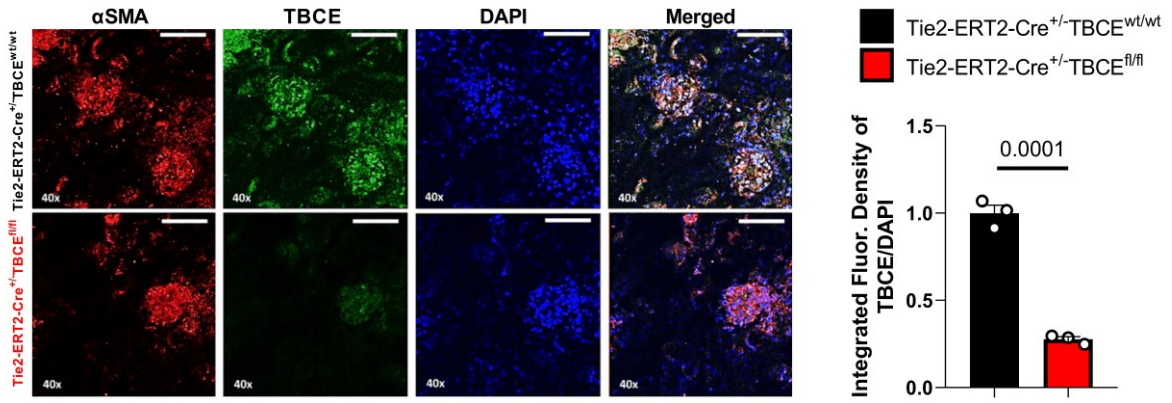

557

558

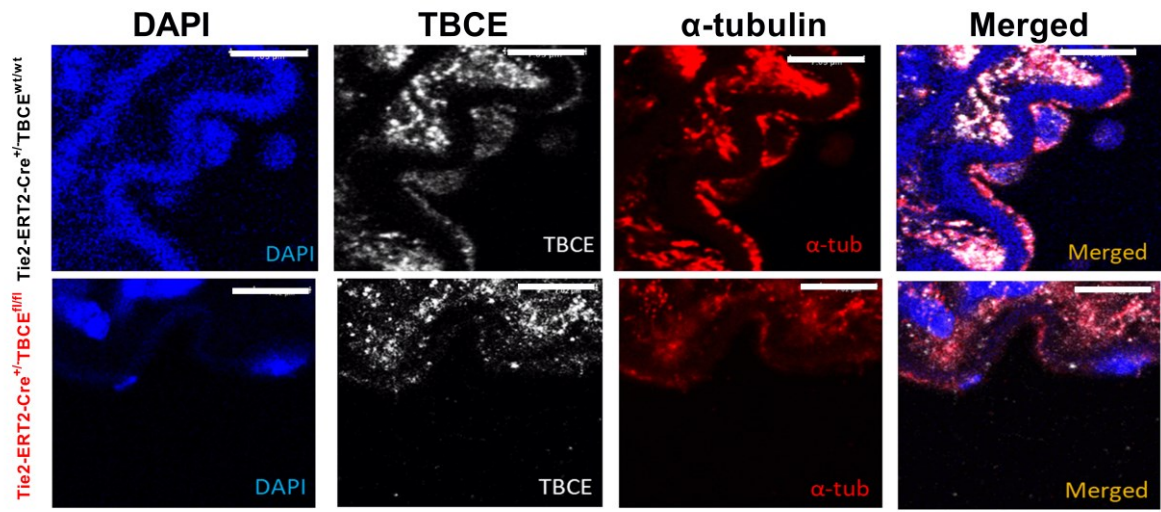



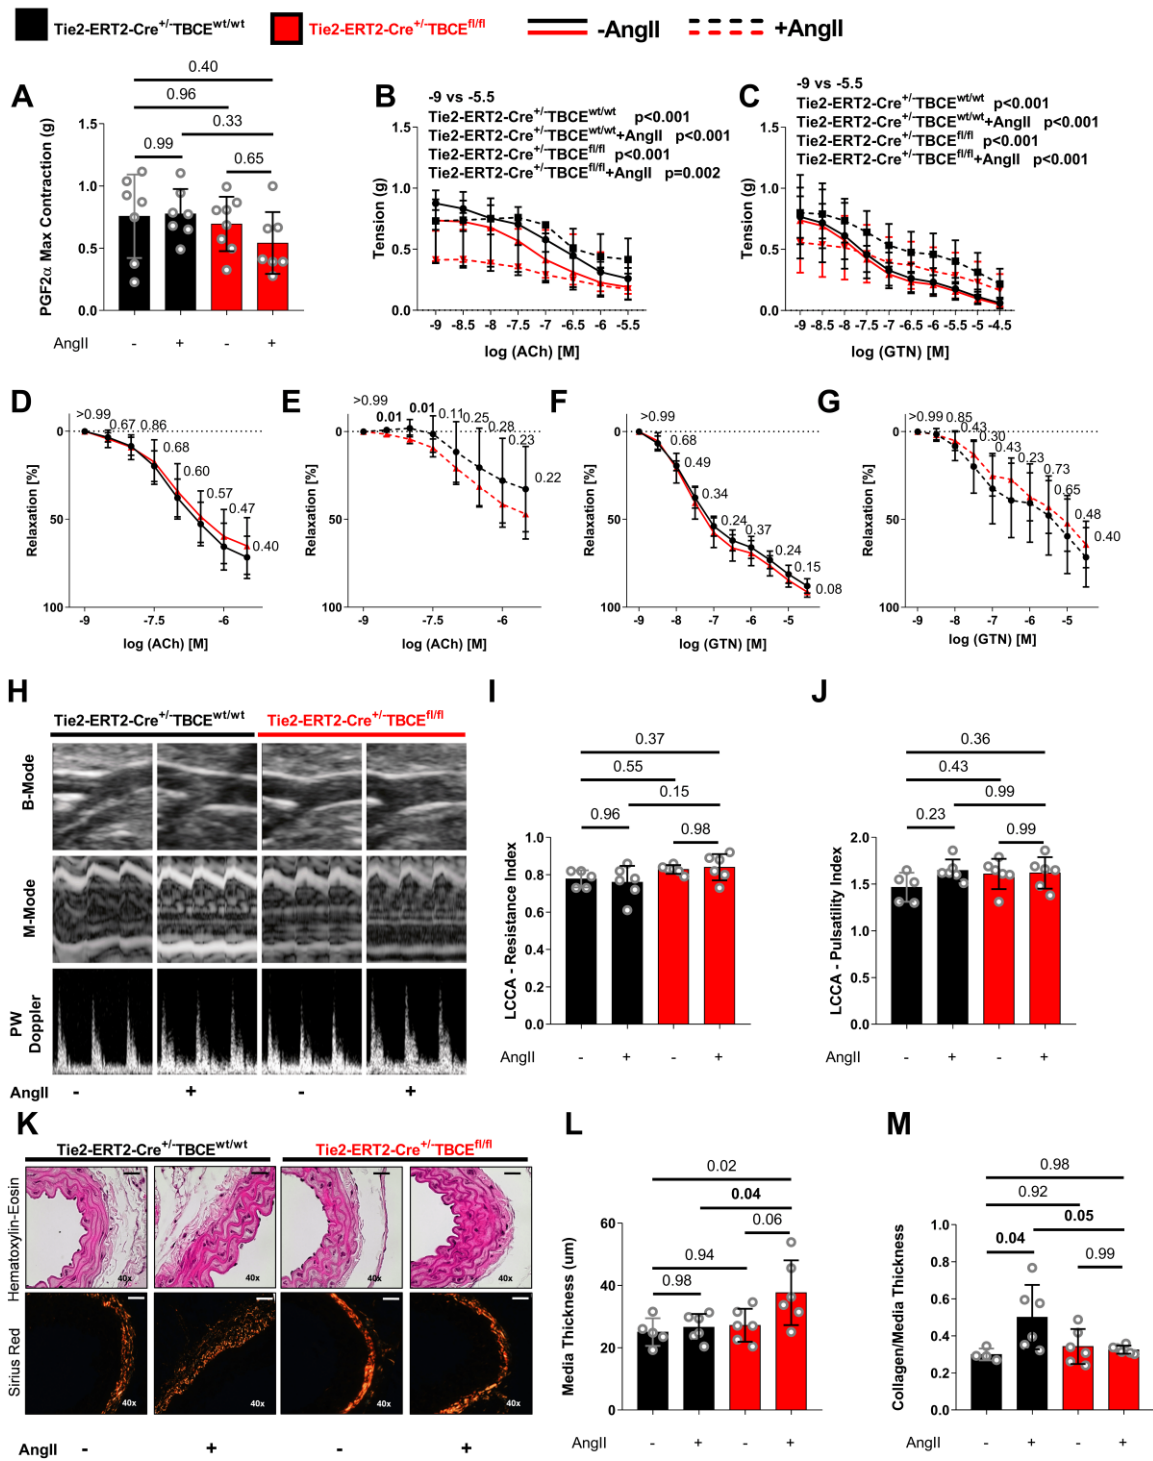



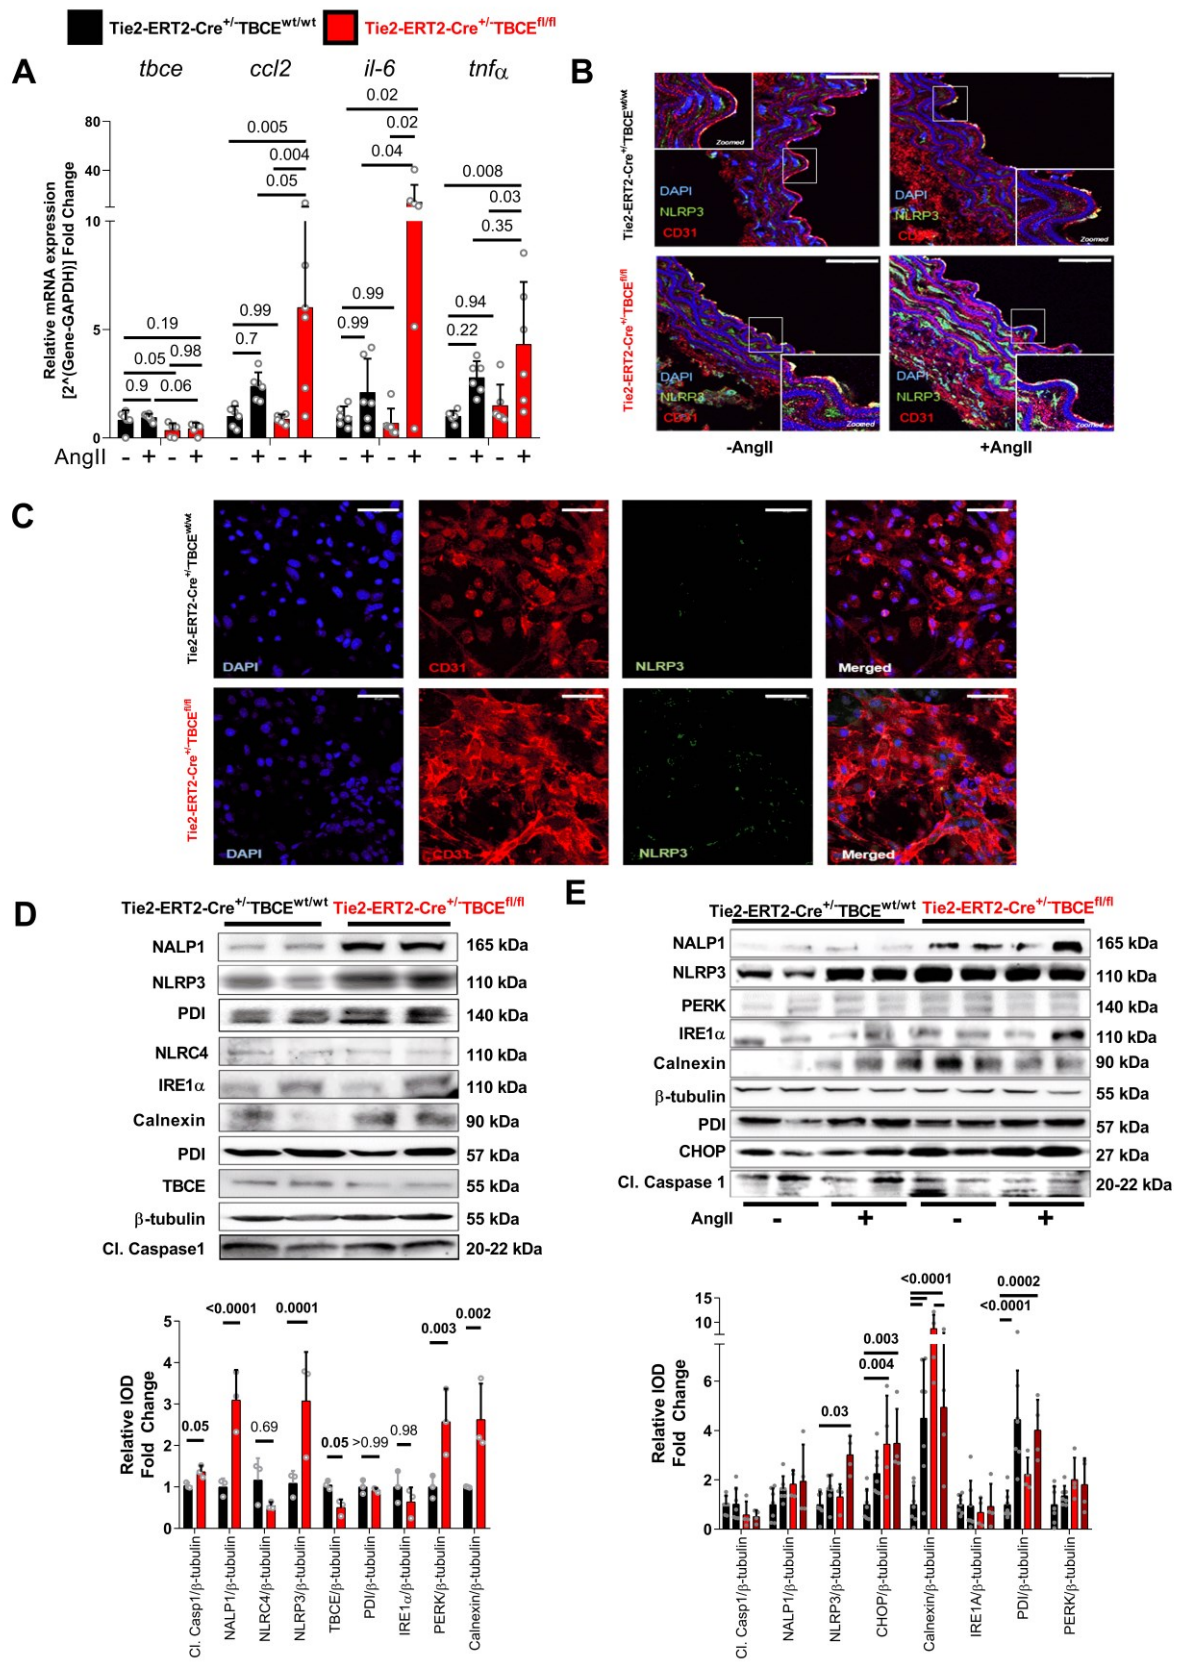

565

566

567

568 **Figure S9**

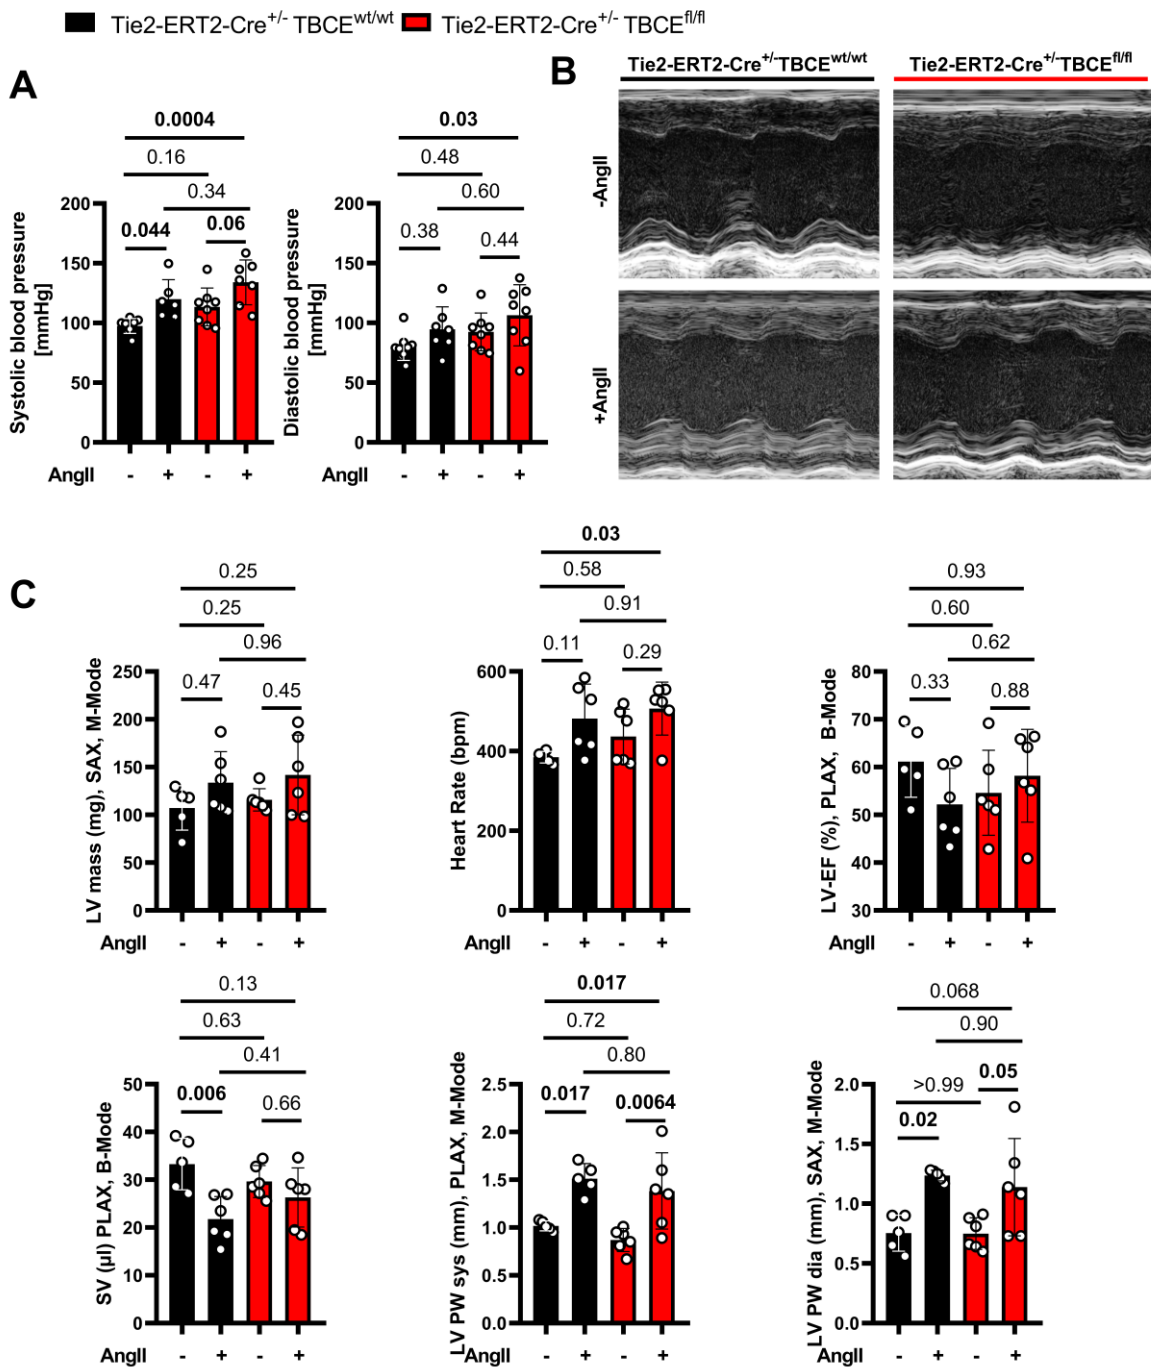

569

570

571

**A**

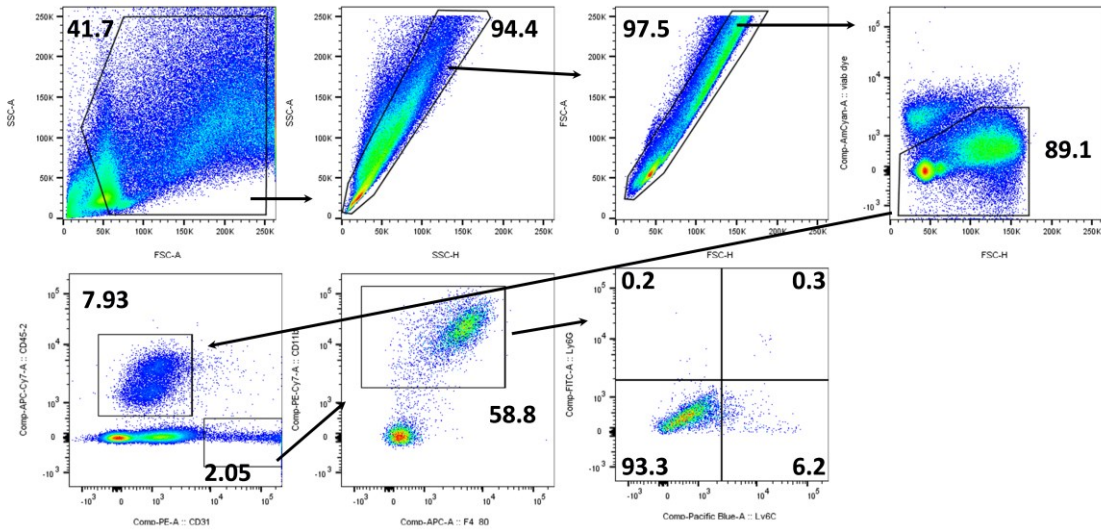

Tie2-ERT2-Cre<sup>+/-</sup>TBCE<sup>wt/wt</sup>
 Tie2-ERT2-Cre<sup>+/-</sup>TBCE<sup>fl/fl</sup>

**B**

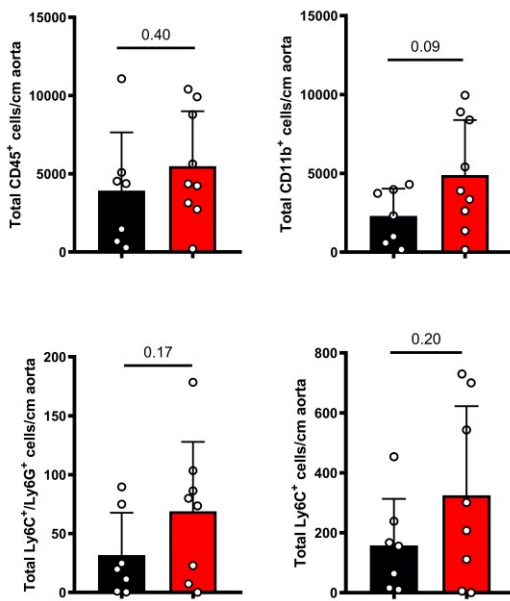

**C**

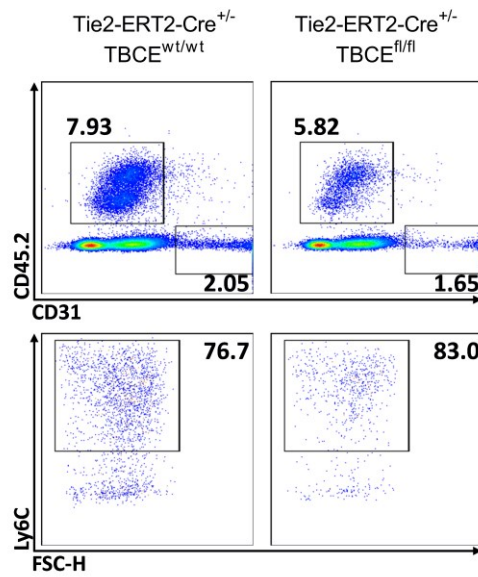

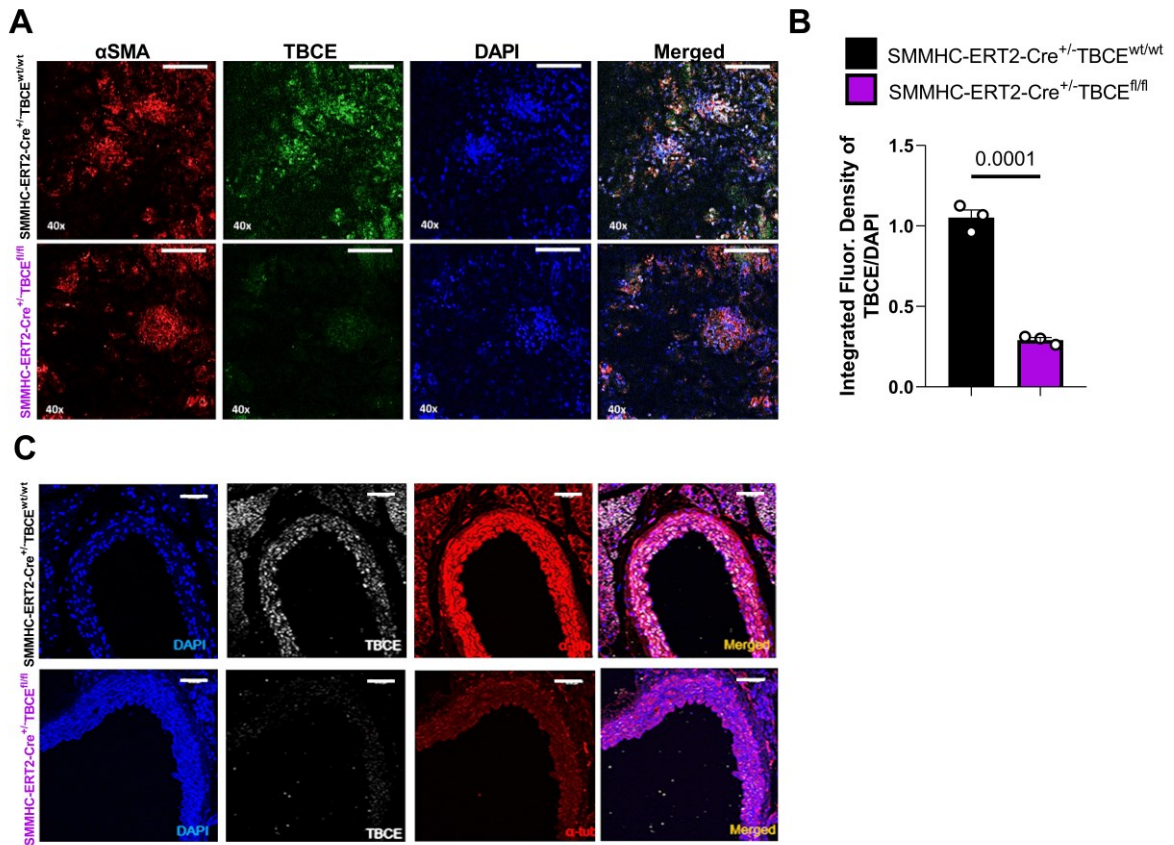



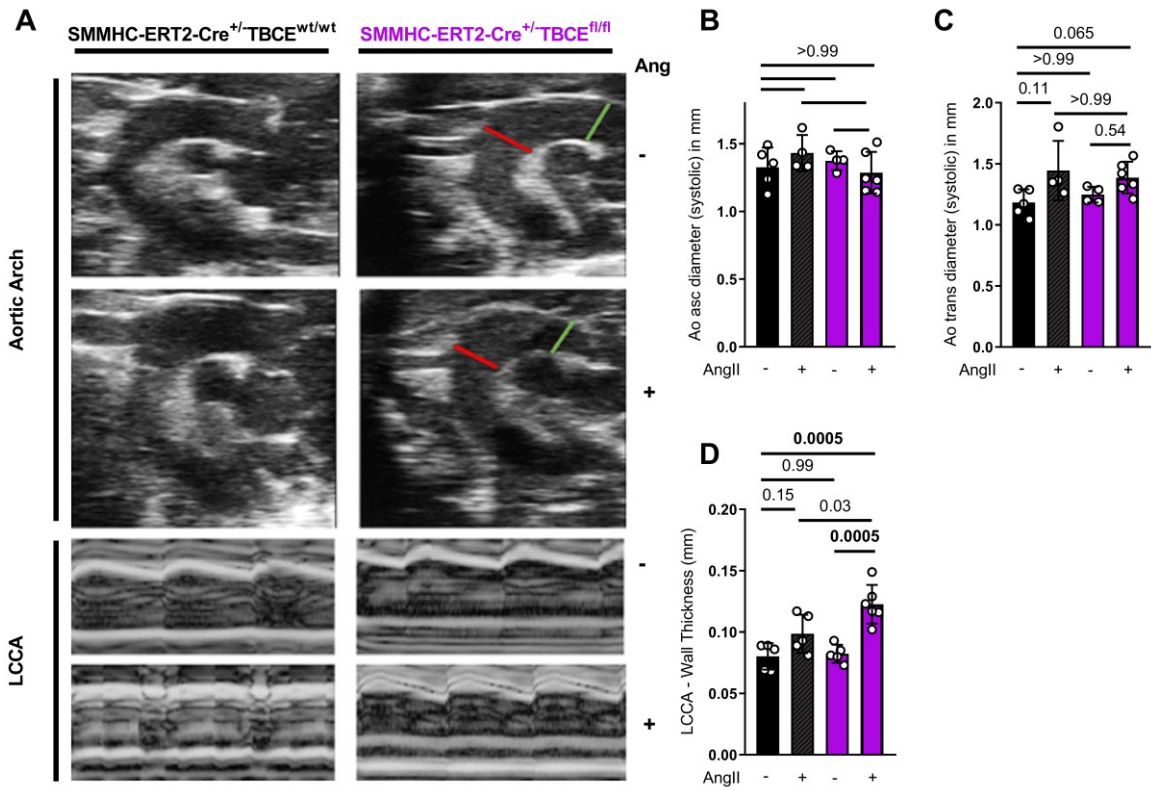

578

579

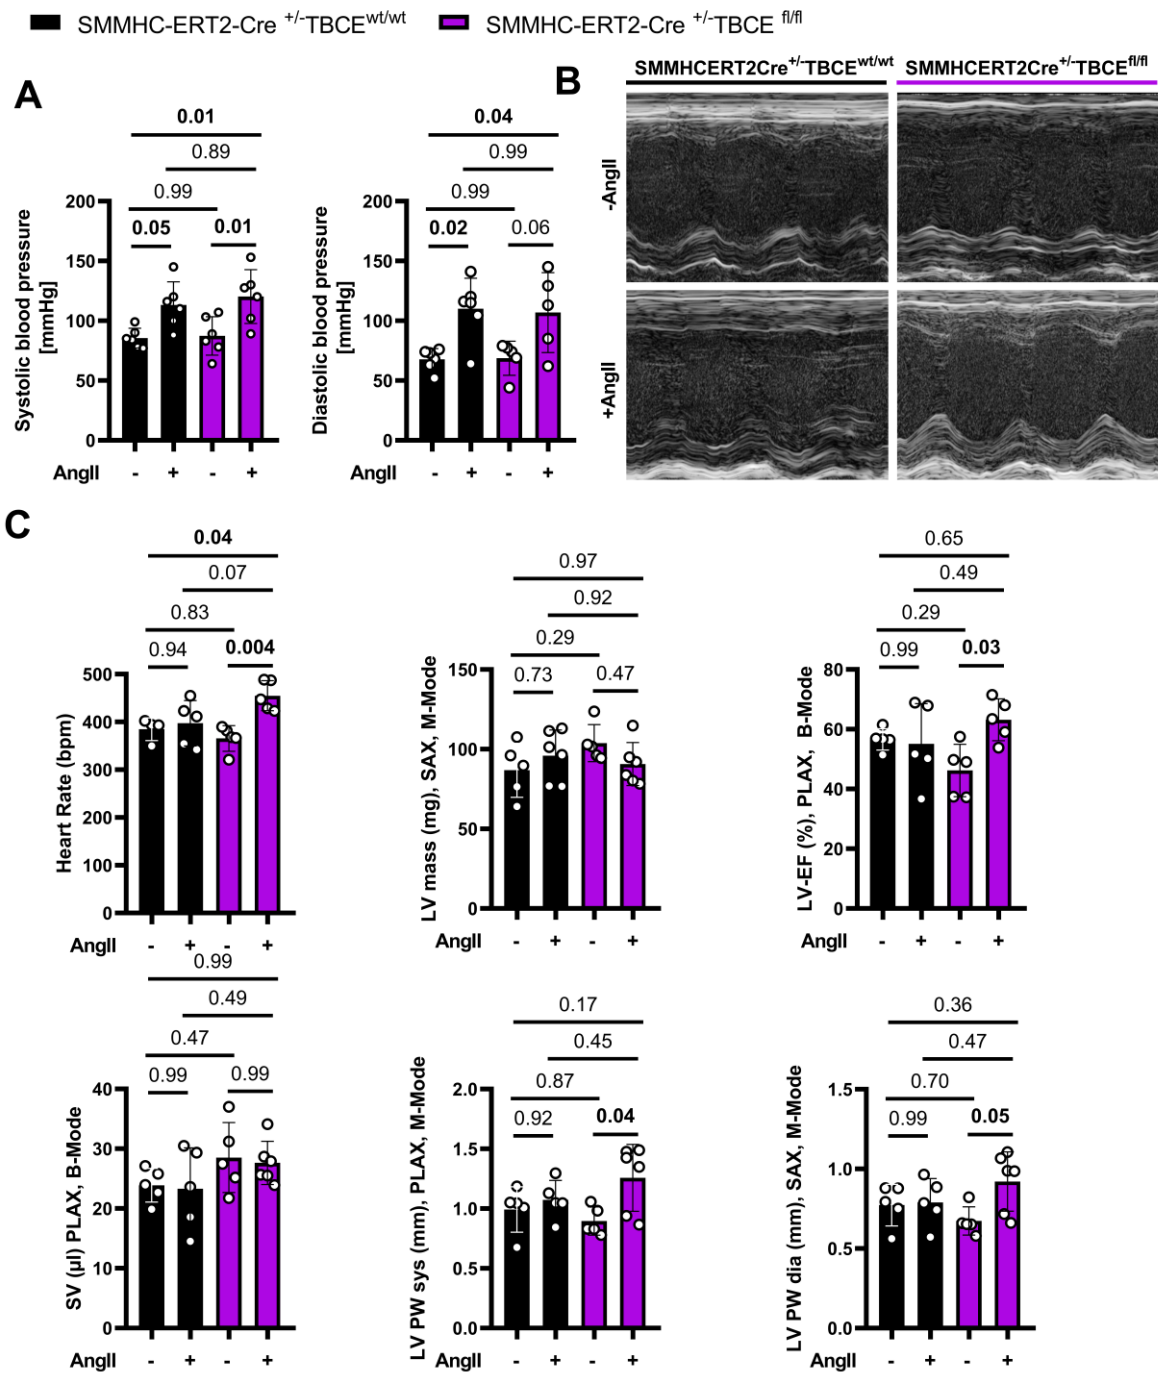

581

582

583

**A**

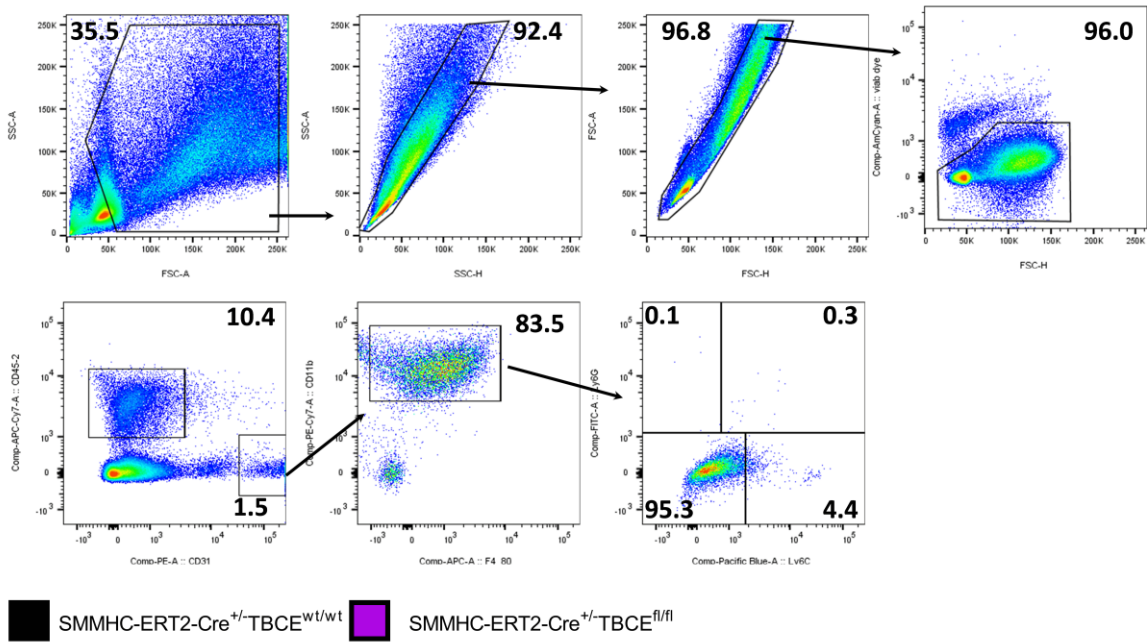

**B**

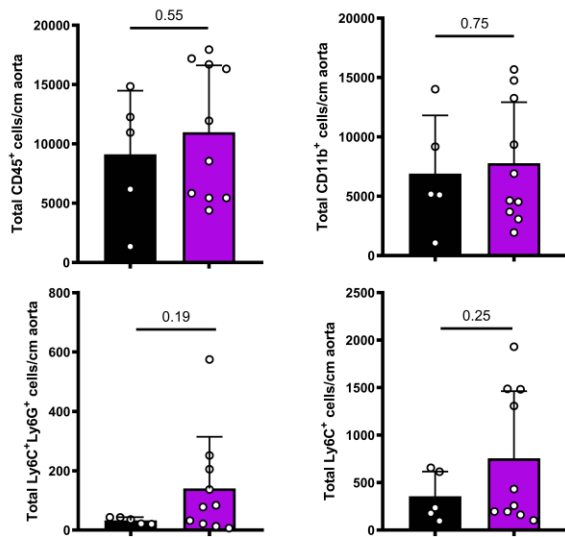

**C**

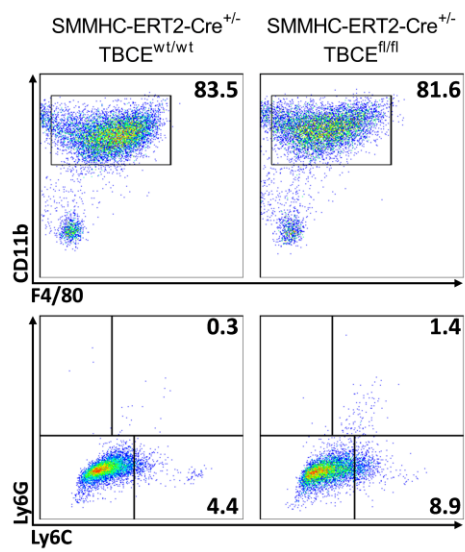

585

586

587
